# Supplementary material
Source: PubMed Central journal article supplement (PMC6112695)
Supplement: pnas.1807377115.sapp.pdf [file pnas.1807377115.sapp.pdf]

1

2 **Supplementary Information for**

3

4 **Declines in methane uptake in forest soils**

5

6 Xiangyin Ni, Peter M Groffman

7

8 Corresponding author: Peter M Groffman

9 Email: peter.groffman@asrc.cuny.edu

10

11

12 **This PDF file includes:**

13

14       Supplementary Methods

15       Figs. S1 to S15

16       Tables S1 to S5

17       Captions for databases S1 to S7

18       References for SI reference citations

19

20 **Other supplementary materials for this manuscript include the following:**

21

22       Datasets S1 to S7

## 23 **Supplementary Methods**

### 24 **Study area**

25 This study was conducted at long-term study sites of the Baltimore Ecosystem Study (BES) and the  
26 Hubbard Brook Ecosystem Study (HBR), which are components of the U.S. National Science  
27 Foundation funded Long-Term Ecological Research (LTER) network. BES research is centered on the  
28 Gwynns Falls watershed in Baltimore, Maryland, USA (39°15' N, 76°30' W; www.beslter.org). The  
29 mean annual air temperatures are 14.5 °C and 12.8 °C, and the mean annual precipitation are 1125 mm  
30 and 1153 mm for the urban and rural forests, respectively (12) (Fig. S7). Vegetation at these sites is  
31 dominated by tulip poplar (*Liriodendron tulipifera* L.) and oaks, primarily chestnut (*Quercus prinus* L.),  
32 scarlet (*Quercus coccinea* Münchh.) and white (*Quercus alba* L.). Plant community composition, soil  
33 characterization, nitrogen (N) mineralization and nitrification, soil solution chemistry and soil-  
34 atmosphere trace gas fluxes are described by Groffman et al. (21) and are summarized in Table S1.

35 In 1998, four urban and four rural forest sites (four chambers per site) were established at three  
36 remnant forests with at least 80% forest canopy to evaluate the influence of urban environment on  
37 forest ecosystems (Table S1; more details were described in ref. 21). The urban forest sites are located  
38 in Hillsdale Park (HD) and Leakin Park (LEA, two sites each), which are public parks close to the  
39 urban core of Baltimore City (5-7 km). Sampling at plot HD2 was discontinued in June 2005 due to  
40 continuing vandalism. The rural forest sites are located in Oregon Ridge Park (two sites at an upper  
41 slope location (ORU) and two sites at a middle slope location (ORM)), which is 20-25 km from the  
42 urban core of Baltimore City. Sampling was stopped at the two ORM sites in June 2010. All sites are

43 more than 100 m from roads or houses, except for the Hillsdale sites, which are located in a smaller  
44 tract less than 100 m from an urban neighborhood (15).

45 HBR is located in the White Mountain National Forest in New Hampshire, USA (43° 56' N, 71° 45'  
46 W; [www.hubbardbrook.org](http://www.hubbardbrook.org)). Vegetation is dominated by American beech (*Fagus grandiflora*), sugar  
47 maple (*Acer saccharum*) and yellow birch (*Betula alleghaniensis*). The site was selectively cut around  
48 1900 and was damaged by a hurricane in 1938. Soils are shallow (75-100 cm), acidic (pH 3.9), Typic  
49 Haplorthods developed from unsorted basal tills. Detailed site information can be found in Groffman et  
50 al. (23) and is summarized in Table S2.

51 This study was conducted in two forested watersheds at HBR: watershed 1 and Bear Brook, which  
52 is just west of the long-term biogeochemical reference watershed (watershed 6) at the site. In October  
53 1999, watershed 1 was fertilized with wollastonite ( $\text{CaSiO}_3$ ) at a rate of 850 kg Ca/ha to replace Ca that  
54 had been depleted by decades of acid deposition (31). Watershed 1 has been continuously monitored  
55 for streamflow since 1956 and stream chemistry since 1963 (17). Both the Ca fertilized and reference  
56 forests are located on south facing slopes (20-30% slope) along an elevation gradient with similar  
57 vegetation. Four sites (three chambers per site) were established in hardwood forests at low (520-560  
58 m), middle (600-650 m) and high elevations (725-750 m) and in a spruce-fir-birch forest (770-850 m)  
59 in each watershed (23).

## 60 **CH<sub>4</sub> flux data collection and analysis**

61 Methane flux at the soil-atmosphere interface was measured using an *in situ* chamber method (32).  
62 Four replicate permanently installed polyvinyl chloride (PVC) base rings, at least 5 m apart, were  
63 installed at each site in Baltimore forests in 1998 and three replicates were installed in Hubbard Brook

64 forests in 2002. For sampling, PVC cylinders (287 mm in diameter and 40 mm high, fitted with an  
65 airtight septum on the chamber tops as gas sampling ports) were placed on the base rings and 9 ml gas  
66 samples were collected using polypropylene syringes at 0, 10, 20 and 30 minutes following placement  
67 of the PVC cylinders (15, 33). All samplings were carried out between 10:00-14:00 hours. Gas samples  
68 were transferred to evacuated glass vials (vacuum for 2 minutes) and stored at room temperature prior  
69 to analysis by gas chromatography (GC, Shimadzu, Kyoto, Japan) with a flame ionization detector at  
70 the Cary Institute of Ecosystem Studies laboratory in Millbrook, NY, USA. The smallest CH<sub>4</sub>  
71 concentration that the GC was able to detect was 0.0156 ppm. Standard CH<sub>4</sub> gases were processed  
72 along with each batch of flux samples. These standards were generated by filling sample vials from a  
73 standard tank in the field laboratory and then processing these samples along with samples taken from  
74 flux chambers in the field. Percent recoveries of the trip standards were used to correct flux values for  
75 leakage or gas absorption that may occur between sampling and analysis. These measurements began  
76 in Baltimore in November 1998 and were made at approximately monthly (4-6 week) intervals.  
77 Measurements at Hubbard Brook began in August 2002 and were made 1-5 times per year during the  
78 growing season.

79 To rule out the possibility that the long-term decline in soil CH<sub>4</sub> uptake was due to repeated use  
80 and possible soil compaction in the *in situ* chambers, we installed two new chambers in one of the  
81 urban (LEA1) and one of the rural forest sites (ORU2) in Baltimore in June 2015. Methane fluxes were  
82 measured in both new and old chambers through February 2016. Seven months of sampling found no  
83 significant (both  $P > 0.05$ ; Fig. S15) differences between old and new chambers, suggesting that the  
84 observed declines in CH<sub>4</sub> uptake in these forest soils were not an artifact of long-term sampling.

85 As described in Groffman et al. (34), CH<sub>4</sub> fluxes were calculated from the linear rate of change in  
86 gas concentration, the chamber internal volume and soil surface area. Flux rate calculations were not  
87 corrected for actual *in situ* temperature and pressure. Single points were removed from regressions if  
88 they were more than 6 times higher or lower than the other three values or if they contradicted a clear  
89 trend in the other three points. This procedure prevents inclusion of high flux rates based on non-  
90 significant regressions. Non-significant regressions were used in flux calculations. This is preferable to  
91 setting these regressions to zero, which biases the statistical distribution of rates.

92 Methane uptake rate ( $U_{CH_4}$ , mg CH<sub>4</sub> m<sup>-2</sup> d<sup>-1</sup>) was calculated as follows:

$$93 \quad U_{CH_4} = -\rho \times \frac{V}{A} \times \frac{\Delta c}{\Delta t} \times 0.001$$

94 where  $\rho$  is the density of CH<sub>4</sub> ( $0.716 \times 10^6$  mg m<sup>-3</sup>) under standard conditions (temperature of 0 °C  
95 and pressure of 101.325 kPa);  $V$  (m<sup>3</sup>) and  $A$  (m<sup>2</sup>) are the volume and area of the chamber, respectively;  
96  $\Delta c/\Delta t$  ( $10^{-6}$  m<sup>3</sup> m<sup>-3</sup> h<sup>-1</sup>) is the rate of change in CH<sub>4</sub> concentration inside the chamber during the  
97 measurement period (0, 10, 20 and 30 minutes).

## 98 **Soil moisture at various soil depths in Baltimore**

99 In the Baltimore forests, time domain reflectometry waveguide probes (Soilmoisture Equipment  
100 Corporation, Santa Barbara, CA, USA) were installed horizontally at 10, 20, 30 and 50 cm depths and  
101 vertically over 0-20 cm depth to measure volumetric soil moisture. Soil moisture data were recorded by  
102 SoilMoisture Trace System I (Model 6050 × 1, version 2000) on each monthly sampling date. Given  
103 that soil moisture at all soil depths showed similar patterns, we only present data from the 10 cm soil  
104 depth.

105 **Soil water flux in Baltimore**

106 In the Baltimore forests, zero tension lysimeters (two or three replicates in two or three plots, total 6  
107 replicates at each site) were installed in soils at 50 cm depth in fall 1998 to collect leachate exported  
108 from upper soil depths (22). At the same time, porous cup tension lysimeters (four replicates per plot)  
109 were installed at 10 and 50 cm depths. To collect leachate samples from tension lysimeters, lysimeters  
110 were manually suctioned by pump (inner pressure >0.6 MPa) 24 hours before sampling. Leachate  
111 samples were collected with a hand pump at approximately monthly intervals at approximately the  
112 same time that measurements of CH<sub>4</sub> flux and soil moisture were made. The volume of leachate  
113 collected from lysimeters was measured immediately, and approximately 100 ml samples were stored  
114 at 4 °C prior to analysis. Concentrations of nitrate (NO<sub>3</sub><sup>-</sup>) and ammonium (NH<sub>4</sub><sup>+</sup>) were analyzed  
115 colorimetrically using a flow injection analyzer. Monthly data were compiled to produce annual values  
116 using a “water year” from October to September of the following year. All data are available in the  
117 BES LTER ([www.beslter.org](http://www.beslter.org)) data repository.

118 **Soil sampling at Hubbard Brook**

119 In the Hubbard Brook forests, soil samples (Oi/Oe, Oa/A and 0-10 cm mineral soils) at the four  
120 elevation sites (5 plots per site) in both watersheds were collected once (July) or three (May, July and  
121 October) times per year beginning in 2002. Four soil core samples were taken at each plot and were  
122 hand-sorted and mixed and stored at 4 °C prior to analysis (less than 1 week).

123 Soil moisture was determined gravimetrically by drying soil samples at 60 °C for 48 h. Amounts  
124 of soil NO<sub>3</sub><sup>-</sup> and NH<sub>4</sub><sup>+</sup> were determined by extraction with 2 mol/l KCl followed by colorimetric  
125 analysis with a flow injection analyzer. Microbial biomass C and N contents were measured using the  
126 chloroform fumigation-incubation method and potential net N mineralization and nitrification were

127 measured in 10 day incubations of field moist soil and laboratory temperatures. In this study, we only  
128 used 0-10 cm mineral soil data collected in summer from 2002 to 2015. All these data are available in  
129 the HBR LTER ([www.hubbardbrook.org](http://www.hubbardbrook.org)) data repository.

### 130 **Atmospheric and climate data**

131 Atmospheric CH<sub>4</sub> concentration data were retrieved from the U.S. National Oceanic and Atmospheric  
132 Administration (NOAA) Global Greenhouse Gas Reference Network (2)  
133 ([https://www.esrl.noaa.gov/gmd/ccgg/trends\\_ch4](https://www.esrl.noaa.gov/gmd/ccgg/trends_ch4); Dataset S5). Atmospheric N deposition data were  
134 retrieved from the U.S. Environmental Protection Agency at the Beltsville (35) (BEL116;  
135 [https://www3.epa.gov/castnet/site\\_pages/BEL116.html](https://www3.epa.gov/castnet/site_pages/BEL116.html)) and Woodstock sites (36) (WST109;  
136 [https://www3.epa.gov/castnet/site\\_pages/WST109.html](https://www3.epa.gov/castnet/site_pages/WST109.html)) to represent N deposition levels in Baltimore  
137 and Hubbard Brook respectively (Dataset S6).

138 Monthly temperature and precipitation data in Baltimore were retrieved from the U.S. NOAA  
139 National Centers for Environmental Information at the Baltimore Washington International Airport site  
140 (37) (<https://gis.ncdc.noaa.gov/maps/ncei/summaries/monthly>; Dataset S7) and were compiled into  
141 mean annual values by “water year”. For Hubbard Brook, temperature data were taken from weather  
142 stations 1 and 6 and precipitation data were taken from rain gages 1, 2 and 3 in watershed 1 and rain  
143 gages 9, 10 and 11 in watershed 6.

### 144 **Data analysis**

145 Annual values for Baltimore were based on a “water year” (from October to September of the  
146 following year), while Hubbard Brook annual means were based on a calendar year. Seasonal dynamics  
147 were analyzed by combining data from different years for each month. We first tested for the effects of

148 forest type (urban versus rural in Baltimore or Ca fertilized versus reference at Hubbard Brook) over  
149 time using a repeated measures analysis of variance (ANOVA). We also used one-way ANOVA to  
150 examine changes in annual CH<sub>4</sub> uptake over time for each forest type and general linear models for  
151 each individual site. Differences between forest types in Baltimore and at Hubbard Brook were  
152 examined by paired t-test or Wilcoxon signed-rank test if sample sizes were unequal using MATLAB  
153 R2012a (MathWorks Inc., Natick, MA, USA).

154 A total of 28 factors were monitored in Baltimore forests but some data were missing on certain  
155 sampling dates (sample sizes were unequal), so we used a partial least squares regression in SIMCA  
156 14.0 (Umetrics, Umeå, Sweden) to distinguish the importance of the different factors on soil CH<sub>4</sub>  
157 uptake. We also used a structural equation model in AMOS 22.0 (IBM SPSS, Chicago, IL, USA) to  
158 examine the effects of soil leachate volume (and/or soil moisture), concentrations of soil NO<sub>3</sub><sup>-</sup> and  
159 NH<sub>4</sub><sup>+</sup>, microbial biomass N and microbial respiration to examine the relative importance of soil  
160 hydrological flux, N cycling and microbial activity on soil CH<sub>4</sub> uptake. In this analysis, each entry must  
161 have the data for all of the variables (leachate volume, volumetric soil moisture, NO<sub>3</sub><sup>-</sup> concentration,  
162 NH<sub>4</sub><sup>+</sup> concentration and microbial respiration in Baltimore; gravimetric soil moisture, NO<sub>3</sub><sup>-</sup>  
163 concentration, NH<sub>4</sub><sup>+</sup> concentration, microbial biomass nitrogen and microbial respiration at Hubbard  
164 Brook) and the entries were removed if data for one or more variables were missing (*n*=308 in  
165 Baltimore and *n*=155 at Hubbard Brook). The data were resampled (499 times) using a Monte Carlo  
166 method. Path coefficients were estimated using a Maximum likelihood method and confidence  
167 intervals were 95%.



## 168 **Global *in situ* soil-atmosphere CH<sub>4</sub> measurements in forests**

169 We compiled studies that measured soil-atmospheric CH<sub>4</sub> fluxes in forests worldwide (Dataset S1)  
170 using Web of Science (<http://apps.webofknowledge.com>). The search terms were “CH<sub>4</sub>”, “methane” or  
171 “trace gas” (“greenhouse gas”, “GHG”). The disciplinary categories included environmental science,  
172 geoscience, soil science, meteorology atmospheric science, plant science, ecology, agronomy,  
173 microbiology, forestry and associated multidisciplinary sciences. Only peer-reviewed journal articles  
174 published before December 2017 with clearly defined study periods were used, and proceeding papers,  
175 reviews and meeting abstracts were excluded. Only *in situ* measurements with closed-chamber methods  
176 in forests and only the data collected from plots without any treatment were used. Years with less than  
177 three data points (e.g., 1981 and 1983) were not included in temporal trend analyses. To assess whether  
178 the declines in soil CH<sub>4</sub> uptake in the two studied temperate forests are general in other forests, the data  
179 collected in Baltimore (15) and Hubbard Brook (ref. 3 in *SI Reference*) were excluded from this  
180 literature analysis. A total of 317 articles (ref. 8-324 in *SI Reference*) that reported *in situ* CH<sub>4</sub> fluxes at  
181 the soil-atmosphere interface in forests were used. The average field monitoring duration was 1.4 years  
182 and 80% of the studies continually measured soil-atmosphere CH<sub>4</sub> fluxes for less than 2 years (Fig. S2).

183 A total of 756 entries of annual CH<sub>4</sub> uptake data (Dataset S2) were directly retrieved from the 317  
184 published articles. Monthly CH<sub>4</sub> uptake data (9789 entries; Dataset S3) were also compiled if the  
185 annual data were not available. These monthly values were compiled to estimate annual uptake to  
186 expand the scope of our regional-scale analysis (3). All of these uptake estimates (10545 entries,  
187 including both annual and monthly data) were grouped into 30 °latitude bands (60-90 °N, 30-60 °N, 0-  
188 30 °N, 0-30 °S and 30-60 °S). Annual precipitation data (from 1987 to 2016) were retrieved from the  
189 meteorological stations closest to these *in situ* CH<sub>4</sub> flux measurement sites using the NOAA website

190 (<https://gis.ncdc.noaa.gov/maps/ncei/cdo/annual>; Dataset S4). We then calculated means for annual  
191 CH<sub>4</sub> uptake and mean annual precipitation for each 30 °latitude band. In addition, continually  
192 monitored volumetric soil moisture data (a total of 3704 entries) were retrieved from the articles and  
193 used to examine the relationship between CH<sub>4</sub> uptake and soil moisture. When the data were presented  
194 as figures, we used Engauge Digitizer 4.1 (Free Software Foundation Inc., Boston, MA, USA) to  
195 extract values.

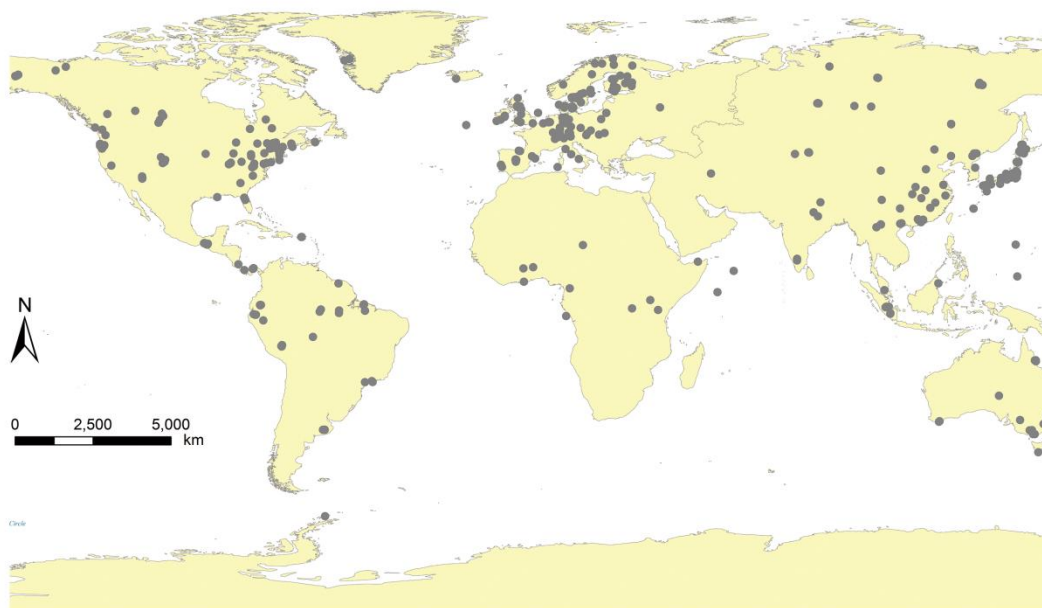

196

197 **Fig. S1.** Global distribution of *in situ* CH<sub>4</sub> flux measurements. A total of 501 entries were  
198 obtained from 317 peer-reviewed journal articles that were published before December 2017.

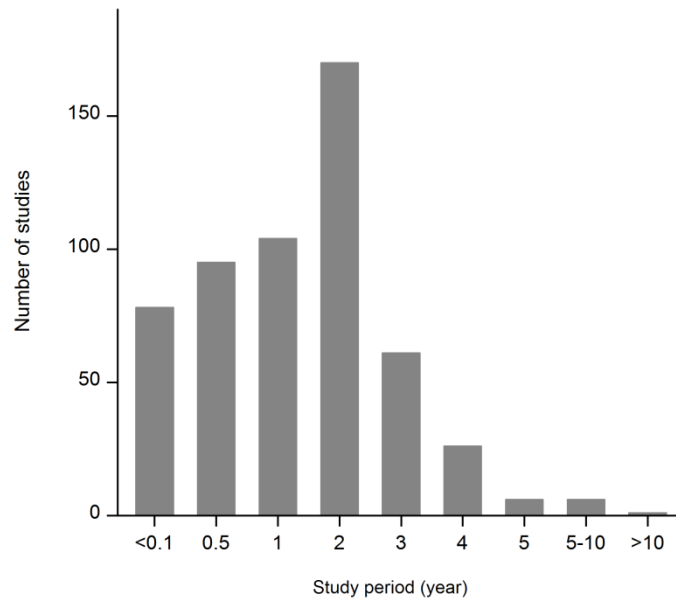

199

200 **Fig. S2.** Length of study periods of in situ CH<sub>4</sub> flux measurements obtained from 317 peer-  
201 reviewed journal articles that were published before December 2017. 80% of these studies  
202 were less than two years.

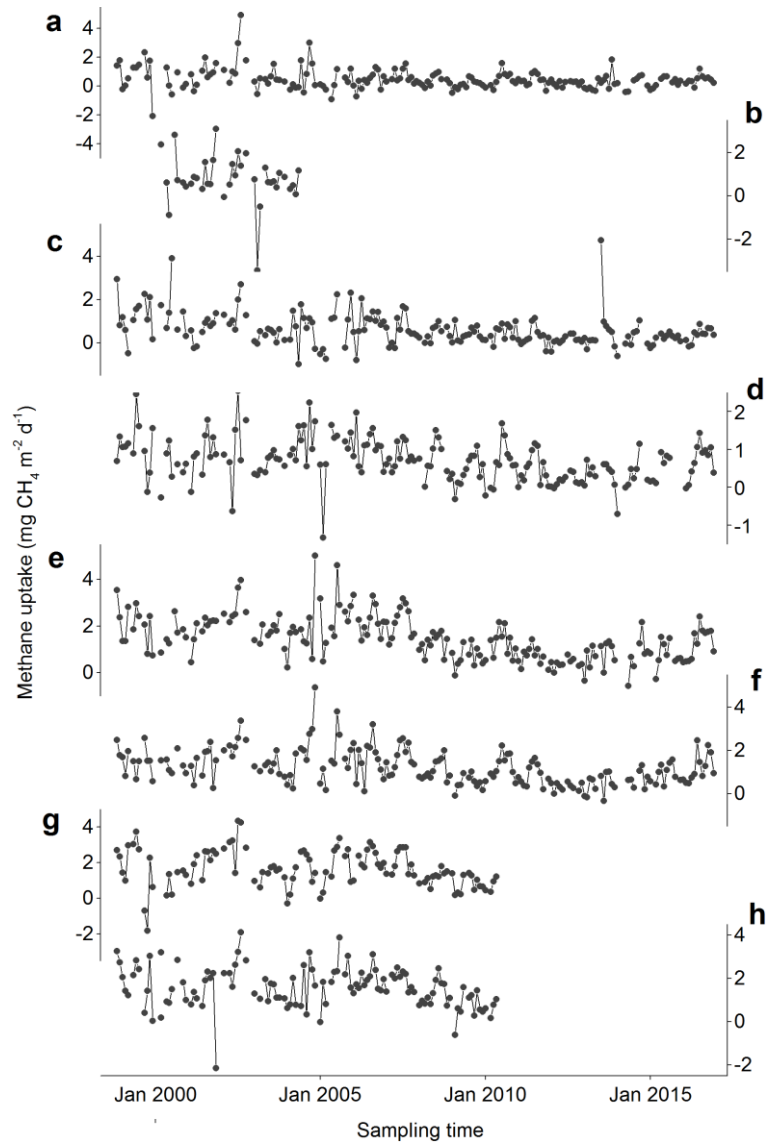

203

204 **Fig. S3.** Monthly CH<sub>4</sub> uptake in Baltimore forests from November 1998 to December 2016.  
 205 (a) Hillsdale Park 1. (b) Hillsdale Park 2. (c) Leakin Park 1. (d) Leakin Park 2. (e) Oregon  
 206 Ridge upper slope 1, (f) Oregon Ridge upper slope 2. (g) Oregon Ridge middle slope 1. (h)  
 207 Oregon Ridge middle slope 2. Sampling was discontinued at the Hillsdale Park 2 site in June  
 208 2004 and at the two Oregon Ridge middle slope sites in June 2010. Sampling was carried out  
 209 approximately monthly (4-6 week). Values are means of 4 replicates without error bars shown.

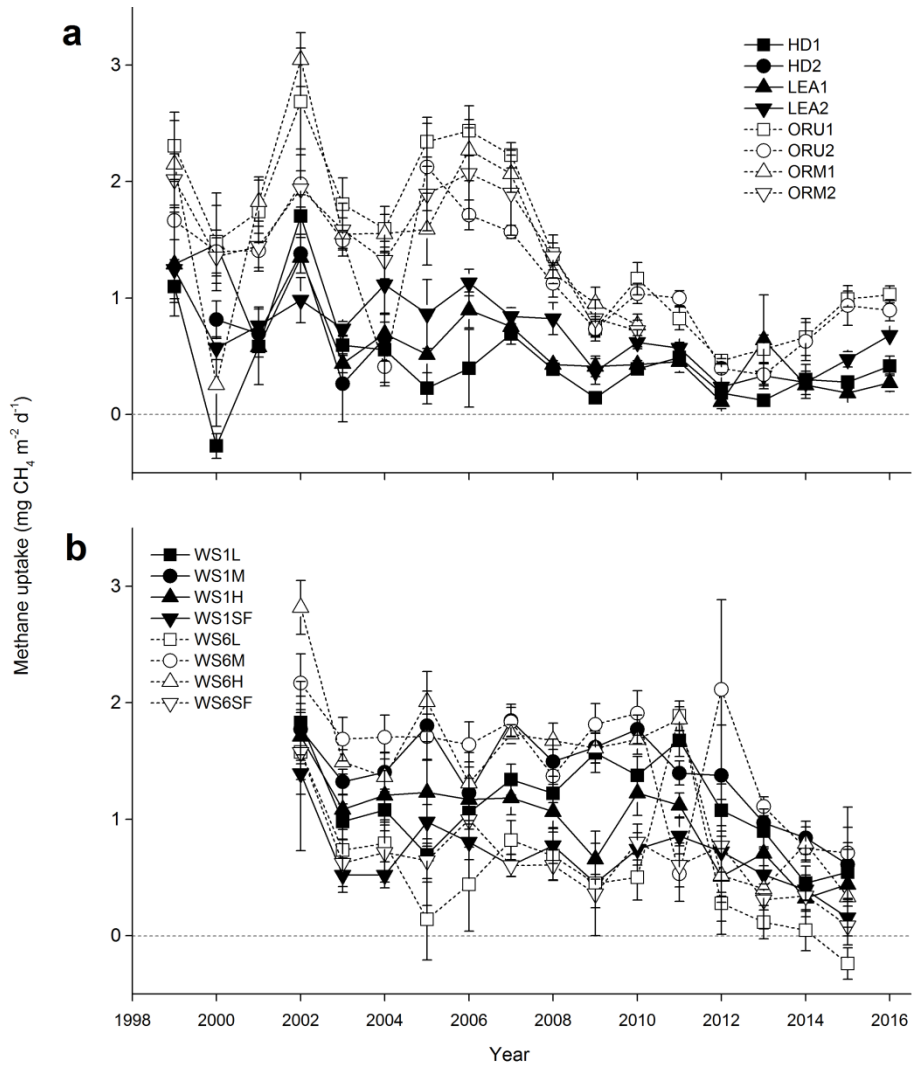

210

211 **Fig. S4.** Annual CH<sub>4</sub> uptake in each site. (a) Baltimore forests. HD1: Hillsdale Park 1, HD2:  
 212 Hillsdale Park 2, LEA1: Leakin Park 1, LEA2: Leakin Park 2, ORU1: Oregon Ridge upper  
 213 upper slope 1, ORU2: Oregon Ridge upper slope 2, ORM1: Oregon Ridge middle slope 1, ORM2:  
 214 Oregon Ridge middle slope 2. The first four sites are urban forests and the latter four sites are  
 215 rural forests. Values ( $\pm$ SE,  $n=4$ ) are means of monthly data for each “water year” (from  
 216 October to September of the following year). (b) Hubbard Brook forests. The sites are located  
 217 along an elevation gradient with hardwood forests at low (L), middle (M) and high (H)  
 218 elevations and a spruce-fir-birch (SF) forest in both watershed 1 (WS1, Ca fertilized) and  
 219 watershed 6 (WS6, reference). Values are means  $\pm$ SE ( $n=3$ ). Methane uptake in all sites  
 220 (except the spruce-fir-birch forest in watershed 1 at Hubbard Brook) significantly decreased  
 221 over time ( $P<0.05$ ; Table S5).

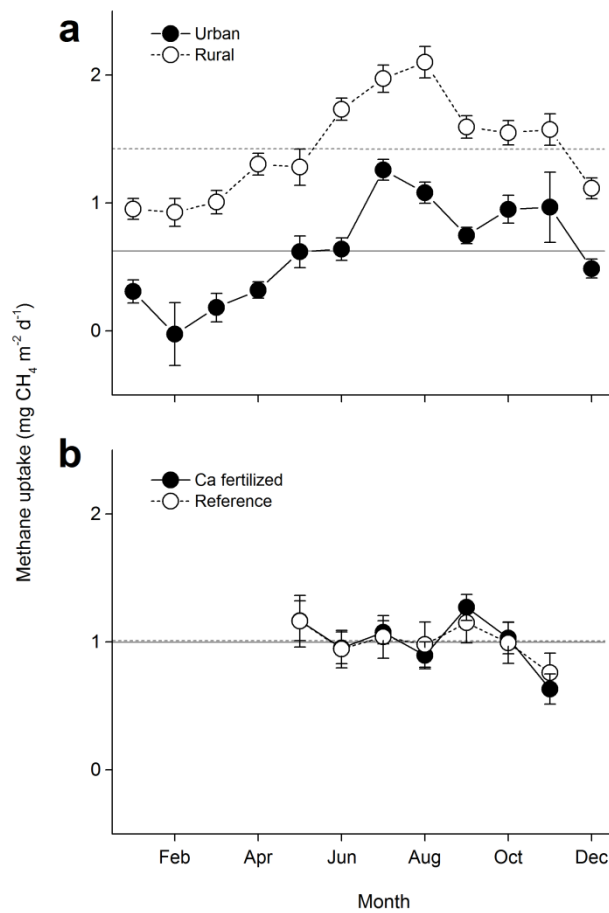

222

223 **Fig. S5.** Seasonal CH<sub>4</sub> uptake. (a) Baltimore forests. (b) Hubbard Brook forests. Values ( $\pm$ SE,  
 224  $n=16$  in Baltimore and  $n=12$  at Hubbard Brook) are means of all years for each month.  
 225 Differences between urban and rural forests in Baltimore were significant ( $P<0.05$ ) for all  
 226 months except November. There were no significant differences between Ca fertilized and  
 227 reference forests at Hubbard Brook. The horizontal lines represent the average values for  
 228 urban (or Ca fertilized, *solid*) and rural (or reference, *dot*) forests separately.

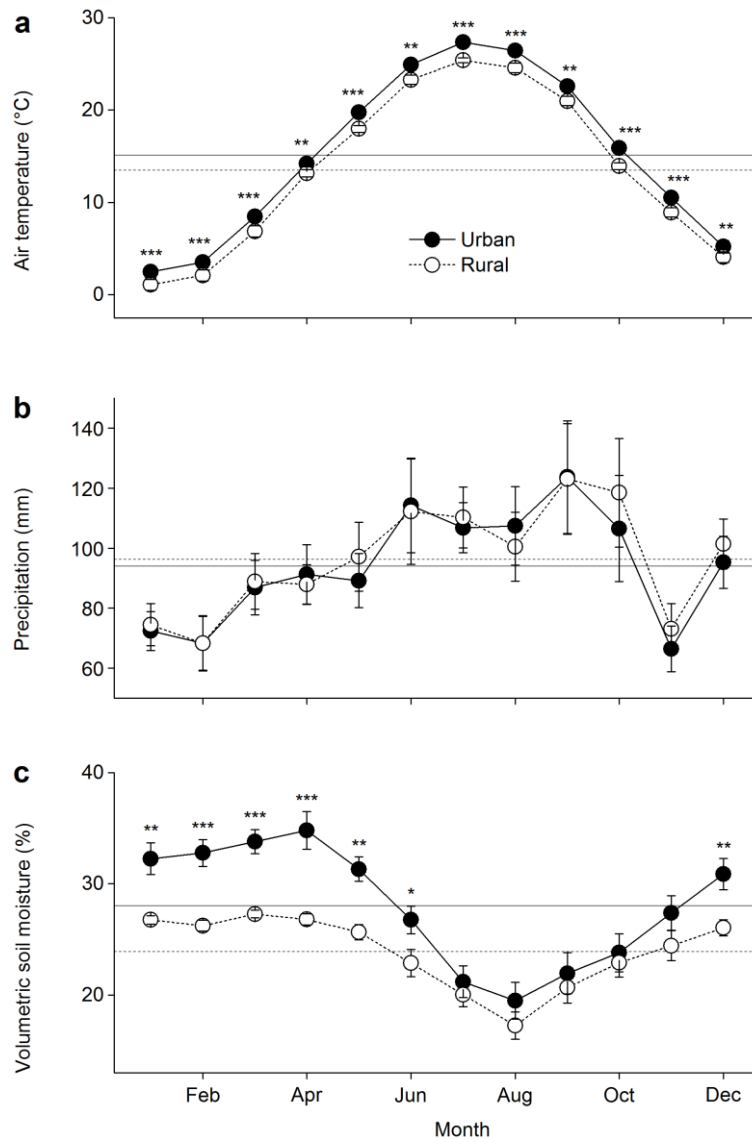

229

230 **Fig. S6.** Monthly temperature, precipitation and soil moisture in Baltimore forests. (a) Air  
 231 temperature. (b) Precipitation. (c) Volumetric soil moisture at 10 cm soil depth. Values ( $\pm$ SE,  
 232  $n=18$ ) are means of all years (from November 1998 to November 2016) for each month. The  
 233 horizontal lines represent the average values for urban (*solid*) and rural (*dot*) forests  
 234 separately. Asterisks show significant differences between urban and rural forests at \* $P<0.05$ ,  
 235 \*\* $P<0.01$  and \*\*\* $P<0.001$ .



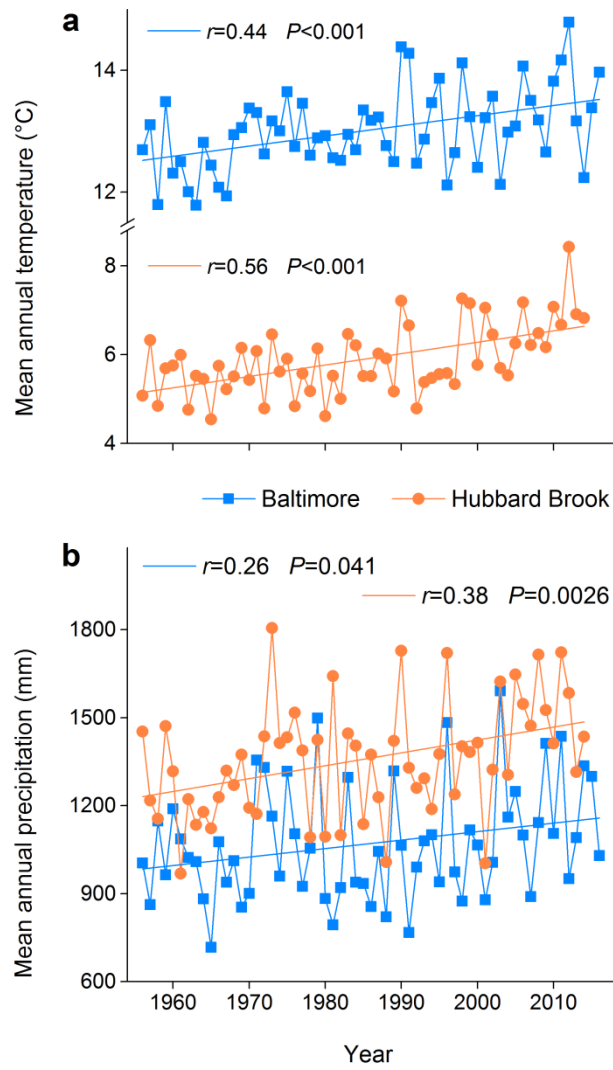

236

237 **Fig. S7.** Temperature and precipitation. (a) Annual air temperatures in Baltimore and  
 238 Hubbard Brook. (b) Mean annual precipitation in Baltimore and Hubbard Brook. Pearson's  $r$   
 239 and  $P$  values of linear regression are shown in each panel.

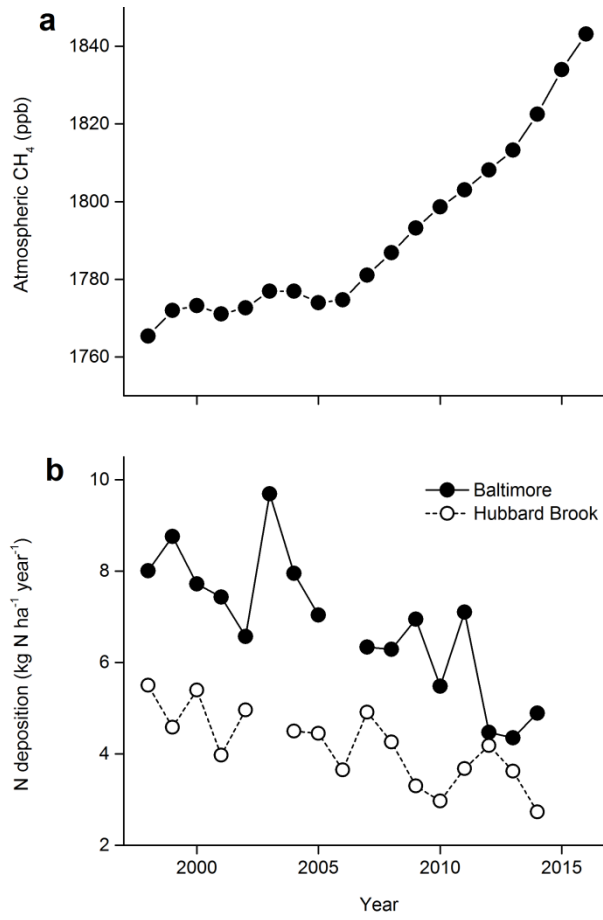

240

241 **Fig. S8.** Atmospheric CH<sub>4</sub>, and nitrogen (N) deposition. (a) Global mean atmospheric CH<sub>4</sub>  
 242 concentration. (b) Total atmospheric N deposition in Baltimore and Hubbard Brook.

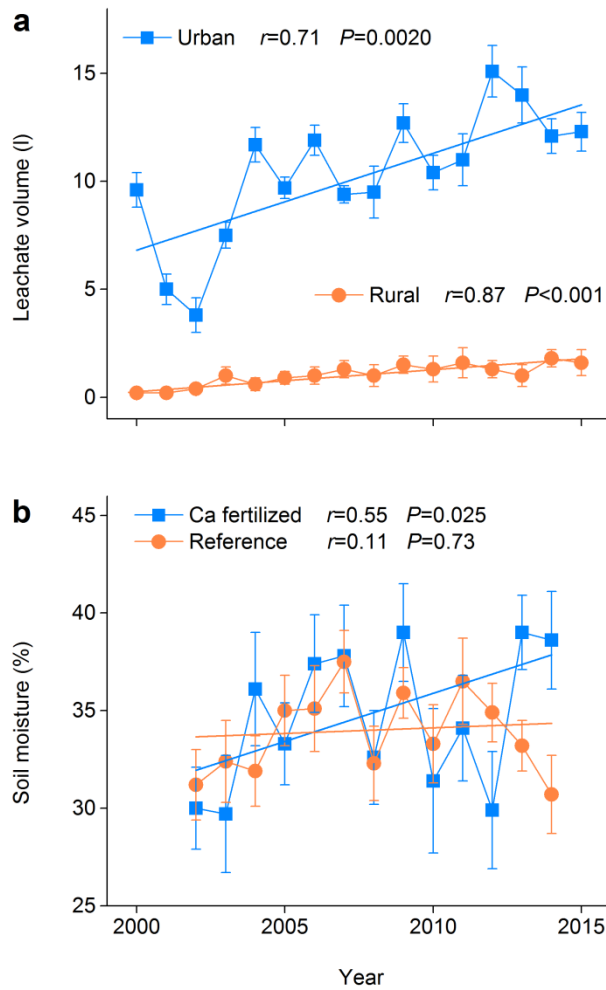

243

244 **Fig. S9.** Soil hydrology. (a) Leachate volume ( $\pm$ SE,  $n=24$ ) collected from zero tension  
 245 lysimeters at 50 cm soil depth in urban and rural forests in Baltimore. Values were compiled  
 246 into “water year” (from October to September of the following year). (b) Gravimetric soil  
 247 moisture ( $\pm$ SE,  $n=20$ ) of 0-10 cm mineral soils in calcium (Ca) fertilized and reference forests  
 248 at Hubbard Brook.

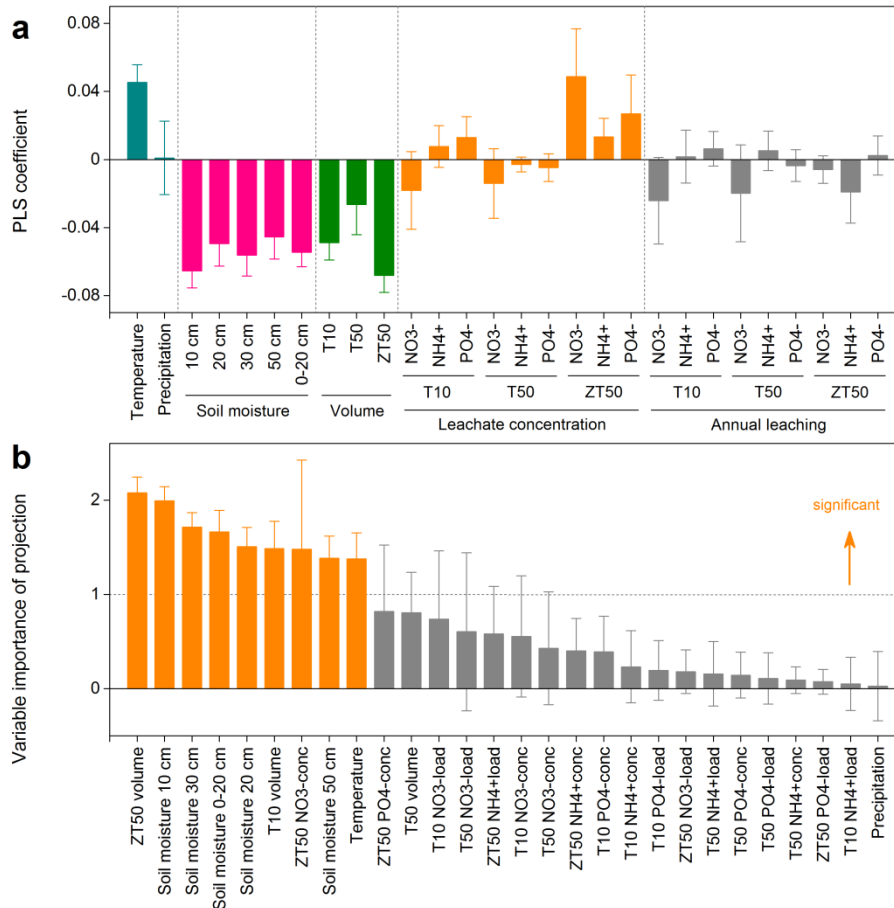

249

250 **Fig. S10.** Partial least squares (PLS) regression results. (a) PLS coefficients for 28 factors  
 251 measured in Baltimore. Values show effect directions of each factor on soil CH<sub>4</sub> uptake. (b)  
 252 Variable importance of each factor. Values greater than 1 (colored) are significant. T10:  
 253 tension lysimeters at 10 cm soil depth, T50: tension lysimeters at 50 cm soil depth, ZT50:  
 254 zero tension lysimeters at 50 cm soil depth, conc: concentration, load: annual leaching. Error  
 255 bars are standard errors ( $n=1030$ ).

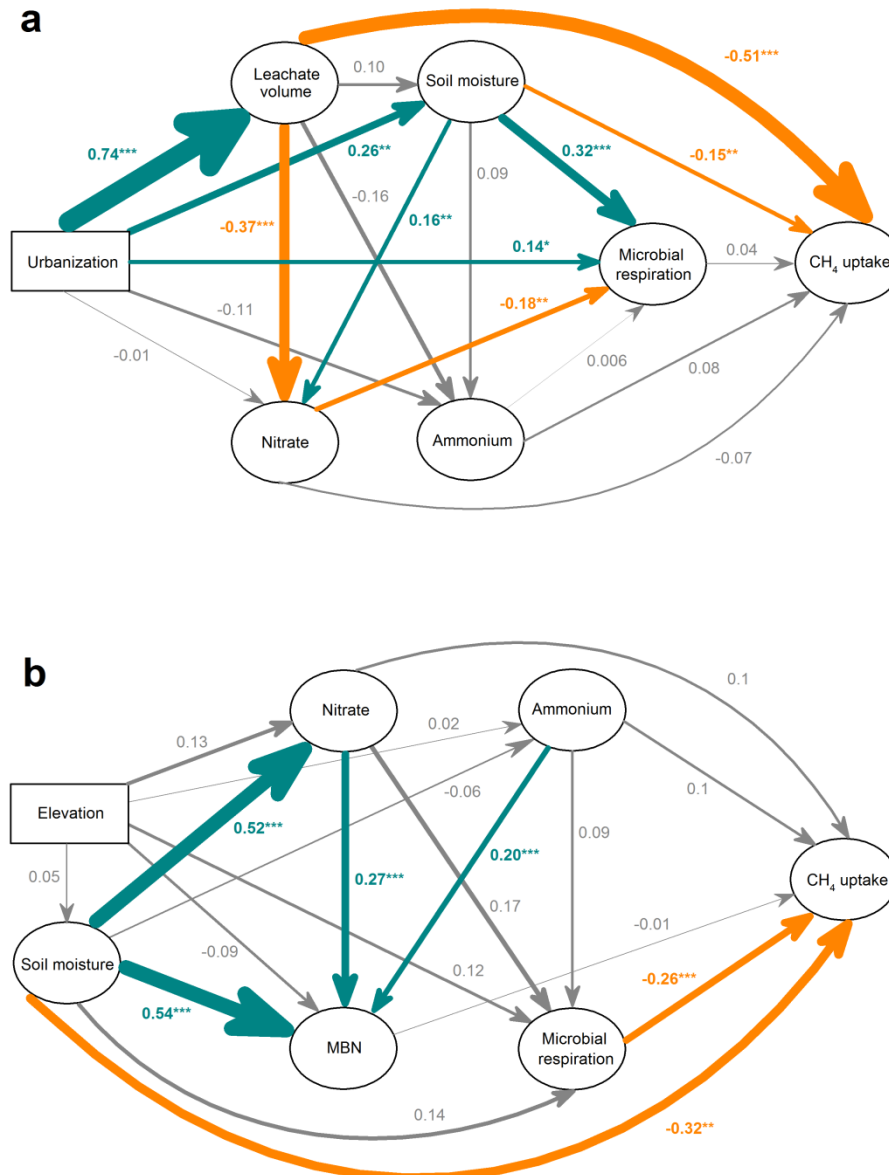

256

257 **Fig. S11.** Structural equation model results. (a) Baltimore forests. (b) Hubbard Brook forests.  
 258 Green and orange arrows denote significant positive and negative effects, and gray arrows  
 259 denote non-significant effects. Width of arrows and associated numbers (standard regression  
 260 weights) represent the strength of path coefficients, and the bold coefficients with asterisks  
 261 are significant (\* $P < 0.05$ , \*\* $P < 0.01$  and \*\*\* $P < 0.001$ ).  $n = 308$  in Baltimore and  $n = 155$  at  
 262 Hubbard Brook. Soil moisture is volumetric at 10 cm soil depth in Baltimore and gravimetric  
 263 at 0-10 cm in the mineral soil at Hubbard Brook. Leachate volume, nitrate and ammonium  
 264 concentrations were collected from zero tension lysimeters at 50 cm depth in Baltimore. All  
 265 data from Hubbard Brook were collected from 0-10 cm in the mineral soil. MBN: microbial  
 266 biomass nitrogen.

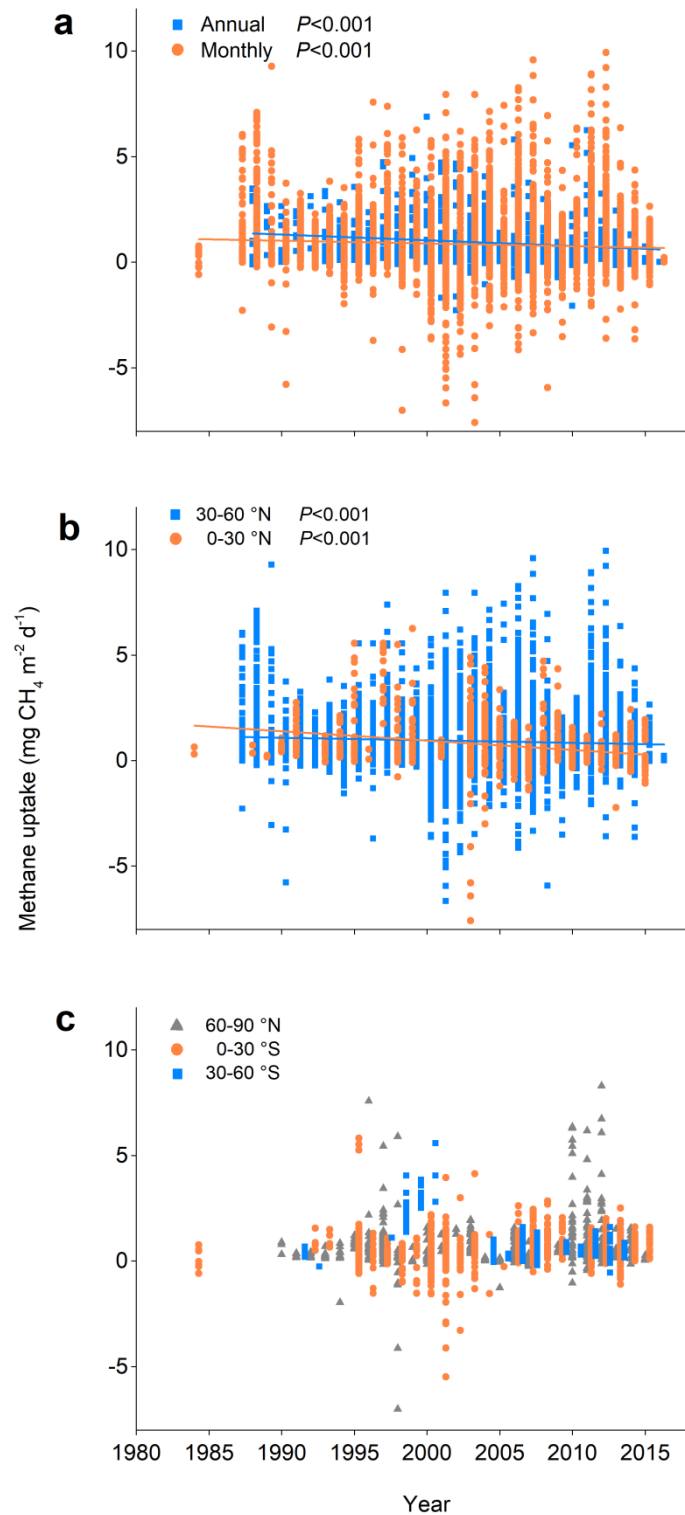

267

268 **Fig. S12.** Methane uptake in forest soils retrieved from published studies. (a) Global actually  
 269 measured (1988 to 2015,  $n=756$ ) and estimated (by using monthly uptake data, 1984 to 2016,  
 270  $n=9789$ ) annual  $\text{CH}_4$  uptake in forest soils. (b) Annual  $\text{CH}_4$  uptake in forest soils from 0-  
 271 30 °N ( $n=1558$ ) and 30-60 °N ( $n=6887$ ) latitude. (b) Annual  $\text{CH}_4$  uptake in forest soils from  
 272 60-90 °N ( $n=759$ ), 0-30 °S ( $n=968$ ) and 30-60 °S ( $n=373$ ) latitude. The data in panels (b) and  
 273 (c) include both actually measured and estimated annual  $\text{CH}_4$  uptake. The data collected at the  
 274 Baltimore and Hubbard Brook sites were excluded from these analyses.

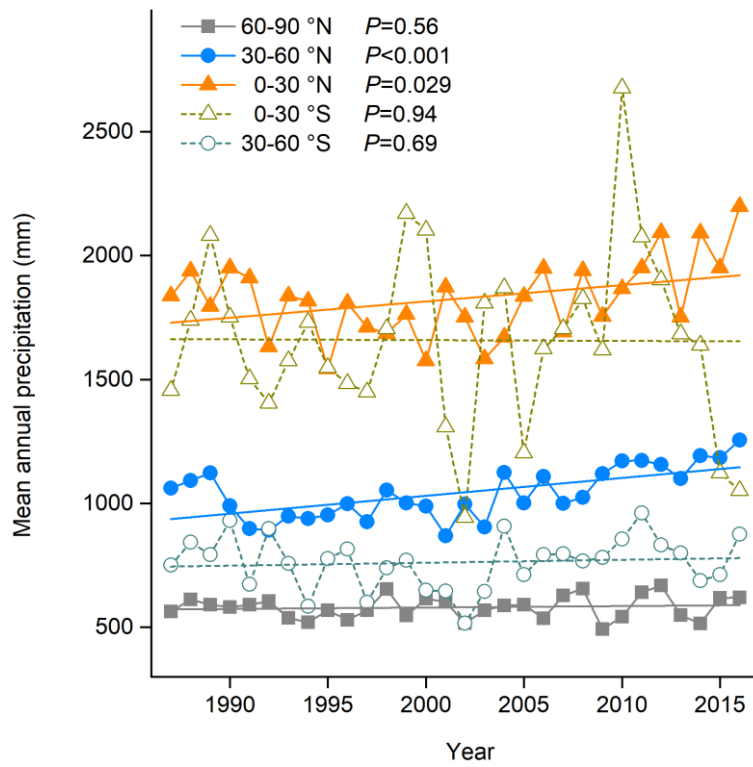

275

276 **Fig. S13.** Annual precipitation over 30° latitude bands from 1987 to 2016. Data were  
 277 compiled from the NOAA website (<https://gis.ncdc.noaa.gov/maps/ncei/cdo/annual>) and were  
 278 collected at or near in situ soil-atmosphere CH<sub>4</sub> measurement sites identified in our literature  
 279 review (Dataset S4). *P* values of linear regression are shown for each latitude band.

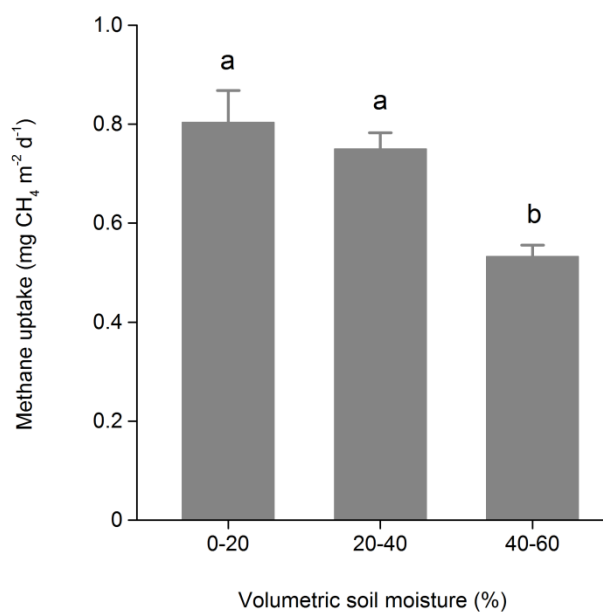

280

281 **Fig. S14.** Methane uptake ( $\pm$ SE) at different soil moisture levels. Values were compiled from  
282 the literature with  $n=1240$ , 1765 and 699 for 0-20%, 20-40% and 40-60% soil moisture,  
283 respectively. Different lowercase letters denote significant ( $P<0.05$ ) differences among soil  
284 moisture levels.



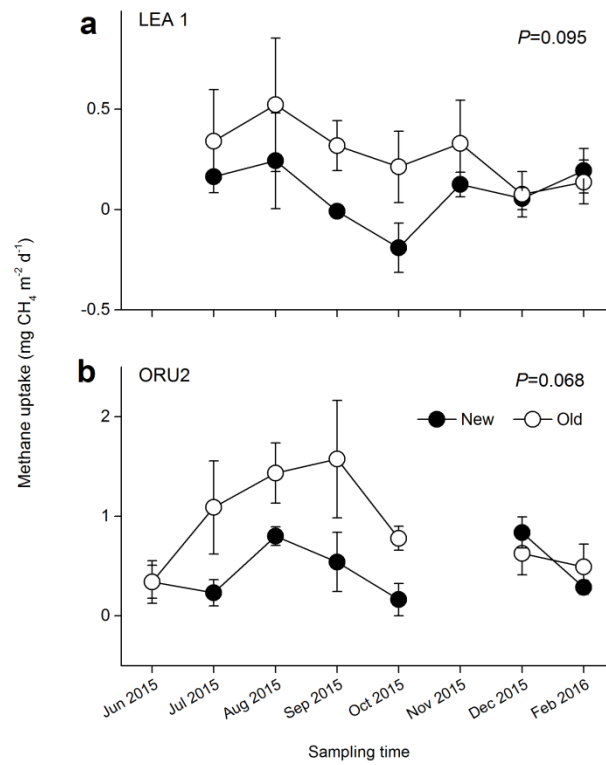

285

286 **Fig. S15.** Methane uptake in new and old chambers. (a) Leakin Park 1 site (LEA 1). (b)  
 287 Oregon Ridge upper slope 2 site (ORU2). Values are mean  $\pm$ SE.  $n=2$  for new chambers and  
 288  $n=4$  for old chambers. There were no significant differences between new and old chambers  
 289 at both sites.

290 **Table S1.** Long-term measurement sites in urban and rural forests in Baltimore, MD, USA.

| Site <sup>1</sup> | Land use | Latitude and Longitude   | Area (m <sup>2</sup> ) | Soil classification                                                      | pH   | Bulk density (g cm <sup>-3</sup> ) | Sand (%) | Silt (%) | Clay (%) | SOM <sup>2</sup> (%) | NO <sub>3</sub> <sup>-</sup> (mg kg <sup>-1</sup> ) | NH <sub>4</sub> <sup>+</sup> (mg kg <sup>-1</sup> ) |
|-------------------|----------|--------------------------|------------------------|--------------------------------------------------------------------------|------|------------------------------------|----------|----------|----------|----------------------|-----------------------------------------------------|-----------------------------------------------------|
| HD1               | Urban    | 39°19'28" N, 76°42'16" W | 900                    | Jackland (fine, smectitic, mesic Typic Hapludalf)                        | 3.48 | 1.0                                | 9.8      | 76.0     | 14.2     | 5.9                  | 0.054                                               | 2.1                                                 |
| HD2               | Urban    | 39°19'31" N, 76°42'29" W | 900                    | Jackland (fine, smectitic, mesic Typic Hapludalf)                        | 3.95 | <i>n.d.</i> <sup>3</sup>           | 9.8      | 76.0     | 14.2     | 4.8                  | 0.84                                                | 0.6                                                 |
| LEA1              | Urban    | 39°18'01" N, 76°41'37" W | 1600                   | Legore (fine-loamy, mixed, mesic, Ultic Hapludalf)                       | 4.14 | 1.2                                | 35.3     | 49.9     | 14.8     | 4.1                  | 0.24                                                | 0.7                                                 |
| LEA2              | Urban    | 39°18'05" N, 76°41'34" W | 1600                   | Occaquon (loamy-skeletal, mixed, subactive Typic Dystrudept)             | 3.52 | 1.3                                | 53.3     | 36.6     | 10.1     | 3.5                  | 0.012                                               | 4.7                                                 |
| ORU1              | Rural    | 39°28'51" N, 76°41'23" W | 1600                   | Glenelg (fine-loamy, paramicaceous, mesic Typic Hapludult)               | 3.87 | 0.8                                | 46.3     | 35.9     | 17.8     | 7.1                  | 0.009                                               | 5.5                                                 |
| ORU2              | Rural    | 39°29'13" N, 76°41'23" W | 1600                   | Glenelg (fine-loamy, paramicaceous, mesic Typic Hapludult)               | 3.93 | 1.1                                | 39.7     | 42.0     | 18.3     | 5.3                  | 0.043                                               | 2.7                                                 |
| ORM1              | Rural    | 39°28'51" N, 76°41'18" W | 1600                   | Glenelg (fine-loamy, paramicaceous, mesic Typic Hapludult)               | 3.87 | 1.0                                | 43.3     | 34.5     | 22.2     | 6.2                  | 0.036                                               | 1.3                                                 |
| ORM2              | Rural    | 39°29'13" N, 76°41'19" W | 1600                   | Manor (coarse-loamy, paramicaceous, semiactive, mesic Typic Dystrchrept) | 4.02 | 1.2                                | 38.3     | 41.6     | 20.1     | 5.9                  | 0.035                                               | 1.7                                                 |

291 <sup>1</sup>HD: Hillsdale Park, LEA: Leakin Park, ORU: Oregon Ridge upper slope, ORM: Oregon Ridge middle slope.

292 <sup>2</sup>Soil organic matter.

293 <sup>3</sup>Not determined.

294 Data from ref. 15 and 20.

295 **Table S2.** Long-term measurement sites along an elevation gradient in Ca fertilized and reference forests at Hubbard Brook, NH, USA.

| Watershed   | Ca treatment     | Site       | Elevation (m) | Soil pH <sup>1</sup>     | Potential N mineralization (mg N kg <sup>-1</sup> soil d <sup>-1</sup> ) | Potential N nitrification (mg N kg <sup>-1</sup> soil d <sup>-1</sup> ) | NO <sub>3</sub> <sup>-</sup> (mg kg <sup>-1</sup> ) | NH <sub>4</sub> <sup>+</sup> (mg kg <sup>-1</sup> ) |
|-------------|------------------|------------|---------------|--------------------------|--------------------------------------------------------------------------|-------------------------------------------------------------------------|-----------------------------------------------------|-----------------------------------------------------|
| Watershed 1 | Ca fertilization | Low        | 520-560       | 4.9±0.037 a              | 0.51±0.24 b                                                              | 0.77±0.21 b                                                             | 2.14±0.83 b                                         | 5.28±1.06 ab                                        |
| Watershed 1 | Ca fertilization | Middle     | 600-650       | 4.5±0.055 b              | 0.86±0.26 b                                                              | 1.16±0.25 b                                                             | 2.54±0.70 ab                                        | 5.73±0.56 ab                                        |
| Watershed 1 | Ca fertilization | High       | 725-750       | 4.6±0.031 b              | 1.73±0.23 b                                                              | 1.55±0.08 b                                                             | 4.37±0.55 ab                                        | 3.67±0.37 ab                                        |
| Watershed 1 | Ca fertilization | Spruce-Fir | 770-850       | 4.1±0.039 c              | 1.81±0.31 b                                                              | 1.02±0.28 b                                                             | 1.60±0.82 b                                         | 6.94±0.98 a                                         |
| Watershed 6 | Reference        | Low        | 520-560       | 5.1±0.077 a              | 0.90±0.20 b                                                              | 0.59±0.24 b                                                             | 0.55±0.31 b                                         | 4.83±1.42 ab                                        |
| Watershed 6 | Reference        | Middle     | 600-650       | <i>n.d.</i> <sup>2</sup> | 4.10±1.59 ab                                                             | 3.85±1.35 ab                                                            | 3.57±0.53 ab                                        | 3.88±0.96 ab                                        |
| Watershed 6 | Reference        | High       | 725-750       | 4.6±0.046 b              | 6.25±1.68 a                                                              | 5.57±1.49 a                                                             | 5.84±1.42 a                                         | 2.52±0.89 b                                         |
| Watershed 6 | Reference        | Spruce-Fir | 770-850       | 4.6±0.024 b              | 1.22±0.42 b                                                              | 0.82±0.29 b                                                             | 1.63±0.81 b                                         | 3.68±0.69 ab                                        |

296 <sup>1</sup>Soil pH was measured in 1:2 soil:H<sub>2</sub>O.

297 <sup>2</sup>Not determined.

298 Data were collected from 0-10 cm mineral soils in 2002. Different lowercase letters in the same column denote significant ( $P<0.05$ ) difference among the  
 299 eight sites.

300 **Table S3.** Results of repeated measures ANOVA testing for the effects of forest type over  
 301 time.

| Variables                                         | Time           |                | Forest         |                | Time × Forest  |                |
|---------------------------------------------------|----------------|----------------|----------------|----------------|----------------|----------------|
|                                                   | <i>F</i> value | <i>P</i> value | <i>F</i> value | <i>P</i> value | <i>F</i> value | <i>P</i> value |
| <b>Baltimore</b>                                  |                |                |                |                |                |                |
| Annual CH <sub>4</sub> uptake                     | 37.6           | < <b>0.001</b> | 327.3          | < <b>0.001</b> | 11.0           | < <b>0.001</b> |
| Monthly CH <sub>4</sub> uptake                    | 20.1           | < <b>0.001</b> | 265.1          | < <b>0.001</b> | 1.1            | 0.35           |
| Precipitation                                     | 17.7           | < <b>0.001</b> | 2.0            | 0.16           | 1.4            | 0.18           |
| Volumetric soil moisture                          | 2.6            | <b>0.0017</b>  | 0.47           | 0.50           | 0.48           | 0.95           |
| Leachate volume                                   | 3.4            | < <b>0.001</b> | 677.3          | < <b>0.001</b> | 3.2            | < <b>0.001</b> |
| Leachate NO <sub>3</sub> <sup>-</sup>             | 1.2            | 0.29           | 21.3           | < <b>0.001</b> | 1.2            | 0.31           |
| Leachate NH <sub>4</sub> <sup>+</sup>             | 0.98           | 0.47           | 11.2           | <b>0.0014</b>  | 0.9            | 0.53           |
| <b>Hubbard Brook</b>                              |                |                |                |                |                |                |
| Annual CH <sub>4</sub> uptake                     | 9.2            | < <b>0.001</b> | 0.02           | 0.89           | 0.41           | 0.97           |
| Monthly CH <sub>4</sub> uptake                    | 2.8            | <b>0.014</b>   | 0              | 0.99           | 0.16           | 0.99           |
| Precipitation                                     | 79.4           | < <b>0.001</b> | 21.8           | < <b>0.001</b> | 0.59           | 0.84           |
| Gravimetric soil moisture                         | 2.1            | <b>0.016</b>   | 0.62           | 0.43           | 1.4            | 0.18           |
| NO <sub>3</sub> <sup>-</sup> in 0-10 mineral soil | 4.9            | < <b>0.001</b> | 6.0            | <b>0.017</b>   | 0.18           | 0.99           |
| NH <sub>4</sub> <sup>+</sup> in 0-10 mineral soil | 8.1            | < <b>0.001</b> | 0.48           | 0.49           | 0.47           | 0.93           |
| Microbial biomass N                               | 2.6            | <b>0.0065</b>  | 0.44           | 0.51           | 1.2            | 0.31           |
| Microbial respiration                             | 10.6           | < <b>0.001</b> | 5.9            | <b>0.018</b>   | 1.9            | <b>0.042</b>   |

302 Bold values are significant ( $P < 0.05$ ).

303 **Table S4.** Linear relationships between annual CH<sub>4</sub> uptake and time.

| Experimental site                 | Equation <sup>1</sup> | <i>n</i> | <i>R</i> <sup>2</sup> | <i>F</i> value | <i>P</i> value   |
|-----------------------------------|-----------------------|----------|-----------------------|----------------|------------------|
| Baltimore                         |                       |          |                       |                |                  |
| Urban forest                      | $y = 91.4 - 0.045 x$  | 18       | 0.46                  | 15.4           | <b>0.0012</b>    |
| Rural forest                      | $y = 188.3 - 0.093 x$ | 18       | 0.47                  | 15.9           | <b>0.0011</b>    |
| Hubbard Brook (from 2002 to 2015) |                       |          |                       |                |                  |
| Ca fertilized forest              | $y = 109.9 - 0.054 x$ | 14       | 0.46                  | 12.1           | <b>0.0022</b>    |
| Reference forest                  | $y = 168.7 - 0.083 x$ | 14       | 0.61                  | 21.0           | <b>&lt;0.001</b> |
| Hubbard Brook (from 2003 to 2015) |                       |          |                       |                |                  |
| Ca fertilized forest              | $y = 88.0 - 0.043 x$  | 13       | 0.33                  | 6.8            | <b>0.025</b>     |
| Reference forest                  | $y = 133.0 - 0.066 x$ | 13       | 0.52                  | 14.0           | <b>0.0033</b>    |
| Literature analysis <sup>2</sup>  |                       |          |                       |                |                  |
| Global                            | $y = 51.4 - 0.025 x$  | 28       | 0.25                  | 10.1           | <b>0.0038</b>    |
| 60-90 °N                          | $y = -43.3 + 0.022 x$ | 25       | 0.063                 | 2.6            | 0.12             |
| 30-60 °N                          | $y = 48.9 - 0.023 x$  | 30       | 0.23                  | 9.9            | <b>0.0039</b>    |
| 0-30 °N                           | $y = 36.6 - 0.018 x$  | 24       | 0.14                  | 4.7            | <b>0.041</b>     |
| 0-30 °S                           | $y = -7.0 + 0.004 x$  | 24       | 0                     | 0.12           | 0.73             |
| 30-60 °S                          | $y = 9.4 - 0.004 x$   | 13       | 0                     | 0.04           | 0.85             |

304 <sup>1</sup>y is annual CH<sub>4</sub> uptake and x is time (year).

305 <sup>2</sup>The data collected in Baltimore and Hubbard Brook were excluded in the literature analysis.

306 The data used for analysis are presented in Fig. 1 and Fig. 2. Bold *P* values are significant

307 (*P*<0.05).

308 **Table S5.** Results of one-way ANOVA testing for the effects of time on annual CH<sub>4</sub> uptake at each individual site in Baltimore and at Hubbard Brook.

| Baltimore                   | <i>df</i> | <i>F</i> value | <i>P</i> value   | Hubbard Brook               | <i>df</i> | <i>F</i> value | <i>P</i> value   |
|-----------------------------|-----------|----------------|------------------|-----------------------------|-----------|----------------|------------------|
| <b>Urban forest</b>         |           |                |                  | <b>Ca fertilized forest</b> |           |                |                  |
| Hillsdale Park 1            | 17        | 9.1            | <b>&lt;0.001</b> | Low elevation               | 13        | 3.0            | <b>0.0068</b>    |
| Hillsdale Park 2            | 4         | 3.9            | <b>0.023</b>     | Middle elevation            | 13        | 2.5            | <b>0.019</b>     |
| Leakin Park 1               | 17        | 3.6            | <b>&lt;0.001</b> | Higher elevation            | 13        | 3.1            | <b>0.0065</b>    |
| Leakin Park 2               | 17        | 4.0            | <b>&lt;0.001</b> | Spruce-Fir                  | 13        | 1.4            | 0.23             |
| <b>Rural forest</b>         |           |                |                  | <b>Reference forest</b>     |           |                |                  |
| Oregon Ridge upper slope 1  | 17        | 11.1           | <b>&lt;0.001</b> | Low elevation               | 13        | 2.4            | <b>0.028</b>     |
| Oregon Ridge upper slope 2  | 17        | 9.6            | <b>&lt;0.001</b> | Middle elevation            | 13        | 3.1            | <b>0.0058</b>    |
| Oregon Ridge middle slope 1 | 11        | 10.7           | <b>&lt;0.001</b> | Higher elevation            | 13        | 7.9            | <b>&lt;0.001</b> |
| Oregon Ridge middle slope 2 | 11        | 3.5            | <b>0.0019</b>    | Spruce-Fir                  | 13        | 2.6            | <b>0.018</b>     |

309 *n*=4 in Baltimore and *n*=3 at Hubbard Brook.

310 Bold P values are significant (*P*<0.05).

311 **Datasets S1 to S7 (separate files)**

312 Dataset S1. Study periods of current global *in situ* measurements of CH<sub>4</sub> uptake in forest soils.

313 Dataset S2. Global *in situ* measurements of annual CH<sub>4</sub> uptake in forest soils.

314 Dataset S3. Global *in situ* measurements of monthly CH<sub>4</sub> uptake in forest soils.

315 Dataset S4. Mean annual precipitation at these sites from 1987 to 2016.

316 Dataset S5. Atmospheric CH<sub>4</sub> concentration.

317 Dataset S6. Nitrogen deposition in Baltimore and Hubbard Brook.

318 Dataset S7. Monthly temperature and precipitation in Baltimore.

319 **References**

- 320 1. Peters SC, Blum JD, Driscoll CT, Likens GE (2004) Dissolution of wollastonite  
321 during the experimental manipulation of Hubbard Brook Watershed 1.  
322 *Biogeochemistry* 67:309-329.
- 323 2. Bowden RD, Steudler PA, Melillo JM, Aber JD (1990) Annual nitrous oxide fluxes  
324 from temperate forest soils in the northeastern United States. *J Geophys Res-*  
325 *Atmos* 95:13997-14005.
- 326 3. Groffman PM, Hardy JP, Driscoll CT, Fahey TJ (2006) Snow depth, soil freezing,  
327 and fluxes of carbon dioxide, nitrous oxide and methane in a northern hardwood  
328 forest. *Global Change Biol* 12:1748-1760.
- 329 4. Groffman PM, Hardy, JP, Fisk MC, Fahey JT, Driscoll CT (2009) Climate  
330 variation and soil carbon and nitrogen cycling processes in a northern hardwood  
331 forest. *Ecosystems* 12:927-943.
- 332 5. EPA (2017). [https://www3.epa.gov/castnet/site\\_pages/BEL116.html](https://www3.epa.gov/castnet/site_pages/BEL116.html).
- 333 6. EPA (2017). [https://www3.epa.gov/castnet/site\\_pages/WST109.html](https://www3.epa.gov/castnet/site_pages/WST109.html).
- 334 7. NOAA/NCEI (2017). <https://gis.ncdc.noaa.gov/maps/ncei/summaries/monthly>
- 335 8. Allen DE, *et al.* (2009) Nitrous oxide and methane emissions from soil are reduced  
336 following afforestation of pasture lands in three contrasting climatic zones, *Aust J*  
337 *Soil Res* 47:443-458.
- 338 9. Amadi CC, Van Rees KCJ, Farrell RE (2016) Soil-atmosphere exchange of carbon  
339 dioxide, methane and nitrous oxide in shelterbelts compared with adjacent  
340 cropped fields. *Agr Ecosyst Environ* 223:123-134.
- 341 10. Ambus P, Jensen JM, Priem éA, Pilegaard K, Kj øller A (2001) Assessment of  
342 CH<sub>4</sub> and N<sub>2</sub>O fluxes in a Danish beech (*Fagus sylvatica*) forest and an adjacent  
343 N-fertilised barley (*Hordeum vulgare*) field: effects of sewage sludge  
344 amendments. *Nutr Cycl Agroecosys* 60:15-21.
- 345 11. Ambus P, Robertson GP (1999) Fluxes of CH<sub>4</sub> and N<sub>2</sub>O in aspen stands grown  
346 under ambient and twice-ambient CO<sub>2</sub>. *Plant Soil* 209:1-8.
- 347 12. Ambus P, Robertson GP (2006) The effect of increased N deposition on nitrous  
348 oxide, methane and carbon dioxide fluxes from unmanaged forest and grassland  
349 communities in Michigan. *Biogeochemistry* 79:315-337.
- 350 13. Aronson EL, Vann DR, Helliker BR (2012) Methane flux response to nitrogen  
351 amendment in an upland pine forest soil and riparian zone. *J Geophys Res-*  
352 *Biogeo* 117:G03012.
- 353 14. Assouma MH, *et al.* (2017) Livestock induces strong spatial heterogeneity of soil  
354 CO<sub>2</sub>, N<sub>2</sub>O and CH<sub>4</sub> emissions within a semi-arid sylvo-pastoral landscape in  
355 West Africa. *J Arid Land* 9:210-221.
- 356 15. Awasthi KD, Sitaula BK, Singh BR, Bajracharya RM (2005) Fluxes of methane  
357 and carbon dioxide from soil under forest, grazing land, irrigated rice and rainfed  
358 field crops in a watershed of Nepal. *Biol Fert Soils* 41:163-172.
- 359 16. Baah-Acheamfour M, Carlyle CN, Lim SS, Bork EW, Chang SX (2016) Forest  
360 and grassland cover types reduce net greenhouse gas emissions from agricultural



- 361 soils. *Sci Total Environ* 571:1115-1127.
- 362 17. Baas P, Knoepp JD, Markewitz D, Mohan JE (2017) Areas of residential  
363 development in the southern Appalachian Mountains are characterized by low  
364 riparian zone nitrogen cycling and no increase in soil greenhouse gas emissions.  
365 *Biogeochemistry* 133:113-125.
- 366 18. Ball BC, McTaggart IP, Watson CA (2002) Influence of organic ley-arable  
367 management and afforestation in sandy loam to clay loam soils on fluxes of N<sub>2</sub>O  
368 and CH<sub>4</sub> in Scotland. *Agr Ecosyst Environ* 90:305-317.
- 369 19. Barrena I, *et al.* (2013) Greenhouse gas fluxes (CO<sub>2</sub>, N<sub>2</sub>O and CH<sub>4</sub>) from forest  
370 soils in the Basque Country: comparison of different tree species and growth  
371 stages. *Forest Ecol Manag* 310:600-611.
- 372 20. Basiliko N, Khan A, Prescott CE, Roy R, Grayston SJ (2009) Soil greenhouse gas  
373 and nutrient dynamics in fertilized western Canadian plantation forests. *Can J*  
374 *Forest Res* 39:1220-1235.
- 375 21. Bellingrath-Kimura SD, *et al.* (2015) Differences in the spatial variability among  
376 CO<sub>2</sub>, CH<sub>4</sub>, and N<sub>2</sub>O gas fluxes from an urban forest soil in Japan. *Ambio* 44:55-  
377 66.
- 378 22. Benanti G, Saunders M, Tobin B, Osborne B (2014) Contrasting impacts of  
379 afforestation on nitrous oxide and methane emissions. *Agr Forest Meteorol* 198-  
380 199:82-93.
- 381 23. Billings SA, Richter DD, Yarie J (2000) Sensitivity of soil methane fluxes to  
382 reduced precipitation in boreal forest soils. *Soil Biol Biochem* 32:1431-1441.
- 383 24. Blankinship JC, Brown JR, Dijkstra P, Allwright MC, Hungate BA (2010)  
384 Response of terrestrial CH<sub>4</sub> uptake to interactive changes in precipitation and  
385 temperature along a climatic gradient. *Ecosystems* 13:1157-1170.
- 386 25. Borken W, Beese F (2006) Methane and nitrous oxide fluxes of soils in pure and  
387 mixed stands of European beech and Norway spruce. *Eur J Soil Sci* 57:617-625.
- 388 26. Borken W, Beese F, Brumme R, Lamersdorf N (2002) Long-term reduction in  
389 nitrogen and proton inputs did not affect atmospheric methane uptake and nitrous  
390 oxide emission from a German spruce forest soil. *Soil Biol Biochem* 34:1815-  
391 1819.
- 392 27. Borken W, Brumme R (1997) Liming practice in temperate forest ecosystems and  
393 the effects on CO<sub>2</sub>, N<sub>2</sub>O and CH<sub>4</sub> fluxes. *Soil Use Manag* 13:251-257.
- 394 28. Borken W, Brumme R, Xu YJ (2000) Effects of prolonged soil drought on CH<sub>4</sub>  
395 oxidation in a temperate spruce forest. *J Geophys Res-Atmos* 105:7079-7088.
- 396 29. Borken W, Davidson EA, Savage K, Sundquist ET, Steudler P (2006) Effect of  
397 summer throughfall exclusion, summer drought, and winter snow cover on  
398 methane fluxes in a temperate forest soil. *Soil Biol Biochem* 38:1388-1395.
- 399 30. Borken W, Xu Y, Beese F (2003) Conversion of hardwood forests to spruce and  
400 pine plantations strongly reduced soil methane sink in Germany. *Global Change*  
401 *Biol* 9:956-966.
- 402 31. Born M, Dörr H, Levin I (1990) Methane consumption in aerated soils of the  
403 temperate zone. *Tellus B* 42:2-8.

- 404 32. Bowden RD, Castro MS, Melillo JM, Steudler PA, Aber JD (1993) Fluxes of  
 405 greenhouse gases between soils and the atmosphere in a temperate forest  
 406 following a simulated hurricane blowdown. *Biogeochemistry* 21:61-71.
- 407 33. Bradford MA, Wookey PA, Ineson P, Lappin-Scott HM (2001) Controlling  
 408 factors and effects of chronic nitrogen and sulphur deposition on methane  
 409 oxidation in a temperate forest soil. *Soil Biol Biochem* 33:93-102.
- 410 34. Brumme, R. & Borken, W. (1999) Site variation in methane oxidation as affected  
 411 by atmospheric deposition and type of temperate forest ecosystem. *Global*  
 412 *Biogeochem Cy* 13:493-501.
- 413 35. Bubier J, Moore T, Savage K, Crill P (2005) A comparison of methane flux in a  
 414 boreal landscape between a dry and a wet year. *Global Biogeochem Cy* 19:1023.
- 415 36. Burke RA, Meyer JL, Cruse JM, Birkhead KM, Paul MJ (1999) Soil-atmosphere  
 416 exchange of methane in adjacent cultivated and floodplain forest soils. *J Geophys*  
 417 *Res-Atmos* 104:8161-8171.
- 418 37. Burke RA, Zepp RG, Tarr MA, Miller WL, Stocks BJ (1997) Effect of fire on  
 419 soil-atmosphere exchange of methane and carbon dioxide in Canadian boreal  
 420 forest sites. *J Geophys Res-Atmos* 102:29289-29300.
- 421 38. Butterbach-Bahl K, Breuer L, Gasche R, Willibald G, Papen H (2002a) Exchange  
 422 of trace gases between soils and the atmosphere in Scots pine forest ecosystems  
 423 of the northeastern German lowlands 1. fluxes of N<sub>2</sub>O, NO/NO<sub>2</sub> and CH<sub>4</sub> at  
 424 forest sites with different N-deposition. *Forest Ecol Manag* 167:123-134.
- 425 39. Butterbach-Bahl K, Gasche R, Huber C, Kreutzer K, Papen H (1998) Impact of N-  
 426 input by wet deposition on N-trace gas fluxes and CH<sub>4</sub>-oxidation in spruce forest  
 427 ecosystems of the temperate zone in Europe. *Atmos Environ* 32:559-564.
- 428 40. Butterbach-Bahl K, *et al.* (2004) Temporal variations of fluxes of NO, NO<sub>2</sub>, N<sub>2</sub>O,  
 429 CO<sub>2</sub>, and CH<sub>4</sub> in a tropical rain forest ecosystem. *Global Biogeochem Cy*  
 430 18:GB3012.
- 431 41. Butterbach-Bahl K, Papen H (2002) Four years continuous record of CH<sub>4</sub>-  
 432 exchange between the atmosphere and untreated and limed soil of a N-saturated  
 433 spruce and beech forest ecosystem in Germany. *Plant Soil* 240:77-90.
- 434 42. Butterbach-Bahl K, Rothe A, Papen H (2002b) Effect of tree distance on N<sub>2</sub>O and  
 435 CH<sub>4</sub>-fluxes from soils in temperate forest ecosystems. *Plant Soil* 240:91-103.
- 436 43. do Carmo JB, de Sousa Neto ER, Duarte-Neto PJ, Ometto JPHB, Martinelli LA  
 437 (2012) Conversion of the coastal Atlantic forest to pasture: Consequences for the  
 438 nitrogen cycle and soil greenhouse gas emissions. *Agr Ecosyst Environ* 148:37-  
 439 43.
- 440 44. Carter MS, *et al.* (2011) Effects of elevated atmospheric CO<sub>2</sub>, prolonged summer  
 441 drought and temperature increase on N<sub>2</sub>O and CH<sub>4</sub> fluxes in a temperate  
 442 heathland. *Soil Biol Biochem* 43:1660-1670.
- 443 45. Castaldi S, Fierro A (2005) Soil-atmosphere methane exchange in undisturbed and  
 444 burned Mediterranean shrubland of Southern Italy. *Ecosystems* 8:182-190.
- 445 46. Castaldi S, Tedesco D (2005) Methane production and consumption in an active  
 446 volcanic environment of Southern Italy. *Chemosphere* 58:131-139.
- 447 47. Castro MS, Gholz HL, Clark KL, Steudler PA (2000) Effects of forest harvesting

- 448 on soil methane fluxes in Florida slash pine plantations. *Can J Forest Res*  
449 30:1534-1542.
- 450 48. Castro MS, Melillo JM, Steudler PA, Chapman JW (1994a) Soil moisture as a  
451 predictor of methane uptake by temperate forest soils. *Can J Forest Res* 24:1805-  
452 1810.
- 453 49. Castro MS, *et al.* (1994b) Effects of nitrogen fertilization on the fluxes of N<sub>2</sub>O,  
454 CH<sub>4</sub>, and CO<sub>2</sub> from soils in a Florida slash pine plantation. *Can J Forest Res*  
455 24:9-13.
- 456 50. Castro MS, Steudler PA, Melillo JM (1995) Factors controlling atmospheric  
457 methane consumption by temperate forest soils. *Global Biogeochem Cy* 9:1-10.
- 458 51. Castro MS, Steudler PA, Melillo JM, Aber JD, Millham S (1993) Exchange of  
459 N<sub>2</sub>O and CH<sub>4</sub> between the atmosphere and soils in spruce-fir forests in the  
460 northeastern United States. *Biogeochemistry* 18:119-135.
- 461 52. Cattânio J, Davidson E, Nepstad D, Verchot L, Ackerman I (2002) Unexpected  
462 results of a pilot throughfall exclusion experiment on soil emissions of CO<sub>2</sub> ,  
463 CH<sub>4</sub> , N<sub>2</sub>O, and NO in eastern Amazonia. *Biol Fert Soils* 36:102-108.
- 464 53. Chan ASK, Parkin TB. (2001) Effect of land use on methane flux from soil. *J*  
465 *Environ Qual* 30:786-797.
- 466 54. Chan ASK, Steudler PA, Bowden RD, Gullede J, Cavanaugh CM (2005)  
467 Consequences of nitrogen fertilization on soil methane consumption in a  
468 productive temperate deciduous forest. *Biol Fert Soils* 41:182-189.
- 469 55. Cheng J, *et al.* (2013) The effects of litter layer and soil properties on the soil-  
470 atmosphere fluxes of greenhouse gases in Karst Forest, southwest China. *Pol J*  
471 *Ecol* 61:79-92.
- 472 56. Christensen TR, Michelsen A, Jonasson S, Schmidt IK (1997) Carbon dioxide and  
473 methane exchange of a subarctic heath in response to climate change related  
474 environmental manipulations. *Oikos* 79:34-44.
- 475 57. Christiansen JR, Gundersen P (2011) Stand age and tree species affect N<sub>2</sub>O and  
476 CH<sub>4</sub> exchange from afforested soils. *Biogeosciences* 8:2535-2546.
- 477 58. Christiansen JR, Gundersen P, Frederiksen P, Vesterdal L (2012) Influence of  
478 hydromorphic soil conditions on greenhouse gas emissions and soil carbon stocks  
479 in a Danish temperate forest. *Forest Ecol Manag* 284:185-195.
- 480 59. Christiansen JR, Levy-Booth D, Prescott CE, Grayston SJ (2016) Microbial and  
481 environmental controls of methane fluxes along a soil moisture gradient in a  
482 Pacific coastal temperate rainforest. *Ecosystems* 19:1255-1270.
- 483 60. Christiansen JR, Outhwaite J, Smukler SM (2015a) Comparison of CO<sub>2</sub>, CH<sub>4</sub> and  
484 N<sub>2</sub>O soil-atmosphere exchange measured in static chambers with cavity ring-  
485 down spectroscopy and gas chromatography. *Agr Forest Meteorol* 211-212:48-  
486 57.
- 487 61. Christiansen JR, *et al.* (2015b) Methane fluxes and the functional groups of  
488 methanotrophs and methanogens in a young Arctic landscape on Disko Island,  
489 West Greenland. *Biogeochemistry* 122:15-33.
- 490 62. Crill PM (1991) Seasonal patterns of methane uptake and carbon release by a  
491 temperate woodland soil. *Global Biogeochem Cy* 5:319-334.

- 492 63. Dannenmann M, *et al.* (2007) The effect of forest management on trace gas  
 493 exchange at the pedosphere - atmosphere interface in beech (*Fagus sylvatica* L.)  
 494 forests stocking on calcareous soils. *Eur J Forest Res* 126:331-346.
- 495 64. Davidson EA, Ishida FY, Nepstad DC (2004) Effects of an experimental drought  
 496 on soil emissions of carbon dioxide, methane, nitrous oxide, and nitric oxide in a  
 497 moist tropical forest. *Global Change Biol* 10:718-730.
- 498 65. Davidson EA, Nepstad DC, Ishida FY, Brando PM (2008) Effects of an  
 499 experimental drought and recovery on soil emissions of carbon dioxide, methane,  
 500 nitrous oxide, and nitric oxide in a moist tropical forest. *Global Change Biol*  
 501 14:2582-2590.
- 502 66. de Urzedo DI, Franco MP, Pitombo LM, do Carmo JB (2013) Effects of organic  
 503 and inorganic fertilizers on greenhouse gas (GHG) emissions in tropical forestry.  
 504 *Forest Ecol Manag* 310:37-44.
- 505 67. Delmas RA, Servant J, Tathy JP, Cros B, Labat M (1992) Sources and sinks of  
 506 methane and carbon dioxide exchanges in mountain forest in equatorial Africa. *J*  
 507 *Geophys Res* 97:6169-6179.
- 508 68. Desyatkin AR, *et al.* (2009) CH<sub>4</sub> emission from different stages of thermokarst  
 509 formation in Central Yakutia, East Siberia. *Soil Sci Plant Nutr* 55:558-570.
- 510 69. D'Imperio L, *et al.* (2017) Methane oxidation in contrasting soil types: responses  
 511 to experimental warming with implication for landscape-integrated CH<sub>4</sub> budget.  
 512 *Global Chang Biol* 23:966-976.
- 513 70. Dinsmore KJ, *et al.* (2017) Growing season CH<sub>4</sub> and N<sub>2</sub>O fluxes from a subarctic  
 514 landscape in northern Finland: from chamber to landscape scale. *Biogeosciences*  
 515 14:799-815.
- 516 71. Dobbie KE, Smith KA (1996) Comparison of CH<sub>4</sub> oxidation rates in woodland,  
 517 arable and set aside soils. *Soil Biol Biochem* 28:1357-1365.
- 518 72. Dobbie KE, *et al.* (1996) Effect of land use on the rate of methane uptake by  
 519 surface soils in Northern Europe. *Atmos Environ* 30:1005-1011.
- 520 73. Dong Y (2003) Experimental study on N<sub>2</sub>O and CH<sub>4</sub> fluxes from the dark  
 521 coniferous forest zone soil of the Gongga Mountain, China. *Sci China Ser D*  
 522 46:285.
- 523 74. Dong Y, Scharffe D, Lobert JM, Crutzen PJ, Sanhueza E (1998) Fluxes of CO<sub>2</sub>,  
 524 CH<sub>4</sub>, and N<sub>2</sub>O from a temperate forest soil: the effects of leaves and humus  
 525 layers. *Tellus B* 50:243-252.
- 526 75. Dörr H, Katruff L, Levin I (1993) Soil texture parameterization of the methane  
 527 uptake in aerated soils. *Chemosphere* 26:697-713.
- 528 76. Dou X, Zhou W, Zhang Q, Cheng X (2016) Greenhouse gas (CO<sub>2</sub>, CH<sub>4</sub>, N<sub>2</sub>O)  
 529 emissions from soils following afforestation in central China. *Atmos Environ*  
 530 126:98-106.
- 531 77. Dubbs LL, Whalen SC (2010) Reduced net atmospheric CH<sub>4</sub> consumption is a  
 532 sustained response to elevated CO<sub>2</sub> in a temperate forest. *Biol Fert Soils* 46:597-  
 533 606.
- 534 78. Eggleton P, *et al.* (1999) Termite assemblages, forest disturbance and greenhouse  
 535 gas fluxes in Sabah, East Malaysia. *Phil Trans R Soc B* 354:1791-1802.

- 536 79. Epron D, *et al.* (2016) Effects of compaction by heavy machine traffic on soil  
537 fluxes of methane and carbon dioxide in a temperate broadleaved forest. *Forest*  
538 *Ecol Manag* 382:1-9.
- 539 80. Erickson HE, Perakis SS (2014) Soil fluxes of methane, nitrous oxide, and nitric  
540 oxide from aggrading forests in coastal Oregon. *Soil Biol Biochem* 76:268-277.
- 541 81. Fang HJ, *et al.* (2010) Effects of multiple environmental factors on CO<sub>2</sub> emission  
542 and CH<sub>4</sub> uptake from old-growth forest soils. *Biogeosciences* 7:395-407.
- 543 82. Fang S, Lin D, Tian Y, Hong S (2016) Thinning intensity affects soil-atmosphere  
544 fluxes of greenhouse gases and soil nitrogen mineralization in a lowland Poplar  
545 plantation. *Forests* 7:141.
- 546 83. Fang Y, *et al.* (2009) Soil-atmosphere exchange of N<sub>2</sub>O, CO<sub>2</sub> and CH<sub>4</sub> along a  
547 slope of an evergreen broad-leaved forest in southern China. *Plant Soil* 319:37-  
548 48.
- 549 84. Fender A-C, *et al.* (2013) Root-induced tree species effects on the source/sink  
550 strength for greenhouse gases (CH<sub>4</sub>, N<sub>2</sub>O and CO<sub>2</sub>) of a temperate deciduous  
551 forest soil. *Soil Biol Biochem* 57:587-597.
- 552 85. Fest B, Hinko-Najera N, von Fischer JC, Livesley SJ, Arndt SK (2017a) Soil  
553 methane uptake increases under continuous throughfall reduction in a temperate  
554 evergreen, broadleaved eucalypt forest. *Ecosystems* 20:368-379.
- 555 86. Fest B, Wardlaw T, Livesley SJ, Duff TJ, Arndt SK (2015b) Changes in soil  
556 moisture drive soil methane uptake along a fire regeneration chronosequence in a  
557 eucalypt forest landscape. *Global Chang Biol* 21:4250-4264.
- 558 87. Fest BJ, *et al.* (2017b) Soil methane oxidation in both dry and wet temperate  
559 eucalypt forests shows a near-identical relationship with soil air-filled porosity.  
560 *Biogeosciences* 14:467-479.
- 561 88. Fest BJ, Livesley SJ, Drösler M, van Gorsel E, Arndt SK (2009) Soil-atmosphere  
562 greenhouse gas exchange in a cool, temperate Eucalyptus delegatensis forest in  
563 south-eastern Australia. *Agr Forest Meteorol* 149:393-406.
- 564 89. Fest BJ, Livesley SJ, von Fischer JC, Arndt SK (2015a) Repeated fuel reduction  
565 burns have little long-term impact on soil greenhouse gas exchange in a dry  
566 sclerophyll eucalypt forest. *Agr Forest Meteorol* 201:17-25.
- 567 90. Fiedler S, *et al.* (2008) Impact of the heatwave in 2003 on the summer CH<sub>4</sub> budget  
568 of a spruce forest with large variation in soil drainage: a four-year comparison  
569 (2001-2004). *J Plant Nutr Soil Sci* 171:666-671.
- 570 91. Flessa H, *et al.* (2008) Landscape controls of CH<sub>4</sub> fluxes in a catchment of the  
571 forest tundra ecotone in northern Siberia. *Global Change Biol* 14:2040-2056.
- 572 92. Galbally IAN, Meyer CP, Wang Y-P, Kirstine W (2010) Soil-atmosphere  
573 exchange of CH<sub>4</sub>, CO, N<sub>2</sub>O and NO<sub>x</sub> and the effects of land-use change in the  
574 semiarid Mallee system in Southeastern Australia. *Global Change Biol* 16:2407-  
575 2419.
- 576 93. Gathany MA, Burke IC (2011) Post-fire soil fluxes of CO<sub>2</sub>, CH<sub>4</sub> and N<sub>2</sub>O along  
577 the Colorado Front Range. *Int J Wildland Fire* 20:838.
- 578 94. Geng J, *et al.* (2017) Soil nitrate accumulation explains the nonlinear responses of  
579 soil CO<sub>2</sub> and CH<sub>4</sub> fluxes to nitrogen addition in a temperate needle-broadleaved

- 580 mixed forest. *Ecol Indic* 79:28-36.
- 581 95. Gomez J, *et al.* (2016) Estimating greenhouse gas emissions at the soil-  
 582 atmosphere interface in forested watersheds of the US Northeast. *Environ Monit*  
 583 *Assess* 188:295.
- 584 96. Guckland A, Flessa H, Prenzel J (2009) Controls of temporal and spatial  
 585 variability of methane uptake in soils of a temperate deciduous forest with  
 586 different abundance of European beech (*Fagus sylvatica* L.). *Soil Biol Biochem*  
 587 41:1659-1667.
- 588 97. Gullledge J, Doyle AP, Schimel JP (1997) Different NH<sub>4</sub><sup>+</sup>-inhibition patterns of  
 589 soil CH<sub>4</sub> consumption: a result of distinct CH<sub>4</sub>-oxidizer populations across sites?  
 590 *Soil Biol Biochem* 29:13-21.
- 591 98. Gullledge J, Schimel JP (2000) Controls on soil carbon dioxide and methane fluxes  
 592 in a variety of taiga forest stands in interior Alaska. *Ecosystems* 3:269-282.
- 593 99. Gundersen P, *et al.* (2012) The response of methane and nitrous oxide fluxes to  
 594 forest change in Europe. *Biogeosciences* 9:3999-4012.
- 595 100. Gütlein A, Gerschlauer F, Kikoti I, Kiese R (2017a). Impacts of climate and land  
 596 use on N<sub>2</sub>O and CH<sub>4</sub> fluxes from tropical ecosystems in the Mt. Kilimanjaro  
 597 region, Tanzania. *Global Change Biol* doi:10.1111/gcb.13944.
- 598 101. Gütlein A, *et al.* (2017b) Nitrogen turnover and greenhouse gas emissions in a  
 599 tropical alpine ecosystem, Mt. Kilimanjaro, Tanzania. *Plant Soil* 411:243-259.
- 600 102. Hall SJ, McDowell WH, Silver WL (2013) When wet gets wetter: decoupling of  
 601 moisture, redox biogeochemistry, and greenhouse gas fluxes in a humid tropical  
 602 forest soil. *Ecosystems* 16:576-589.
- 603 103. Hart SC (2006) Potential impacts of climate change on nitrogen transformations  
 604 and greenhouse gas fluxes in forests: a soil transfer study. *Global Change Biol*  
 605 12:1032-1046.
- 606 104. Hassler E, *et al.* (2015) Soil fertility controls soil-atmosphere carbon dioxide and  
 607 methane fluxes in a tropical landscape converted from lowland forest to rubber  
 608 and oil palm plantations. *Biogeosciences* 12:5831-5852.
- 609 105. Hiltbrunner D, Zimmermann S, Karbin S, Hagedorn F, Niklaus PA (2012)  
 610 Increasing soil methane sink along a 120-year afforestation chronosequence is  
 611 driven by soil moisture. *Global Change Biol* 18:3664-3671.
- 612 106. Hofmann K, Farbmacher S, Illmer P (2016) Methane flux in montane and  
 613 subalpine soils of the Central and Northern Alps. *Geoderma* 281:83-89.
- 614 107. Hu R, Kusa K, Hatano R (2001) Soil respiration and methane flux in adjacent  
 615 forest, grassland, and cornfield soils in Hokkaido, Japan. *Soil Sci Plant Nutr*  
 616 47:621-627.
- 617 108. Hudgens DE, Yavitt JB (1997) Land-use effects on soil methane and carbon  
 618 dioxide fluxes in forests near Ithaca, New York. *Ecoscience* 4:214-222.
- 619 109. Inclán R, *et al.* (2012) N<sub>2</sub>O and CH<sub>4</sub> fluxes in undisturbed and burned holm oak,  
 620 scots pine and pyrenean oak forests in central Spain. *Biogeochemistry* 107:19-41.
- 621 110. Iqbal J, Lin S, Hu R, Feng M (2009) Temporal variability of soil-atmospheric  
 622 CO<sub>2</sub> and CH<sub>4</sub> fluxes from different land uses in mid-subtropical China. *Atmos*

- 623 *Environ* 43:5865-5875.
- 624 111. Ishizuka S, *et al.* (2005a) The variation of greenhouse gas emissions from soils  
625 of various land-use/cover types in Jambi province, Indonesia. *Nutr Cycl*  
626 *Agroecosy* 71:17-32.
- 627 112. Ishizuka S, *et al.* (2005b) Spatial patterns of greenhouse gas emission in a  
628 tropical rainforest in Indonesia. *Nutr Cycl Agroecosy* 71:55-62.
- 629 113. Ishizuka S, Sakata T, Ishizuka K (2000) Methane oxidation in Japanese forest  
630 soils. *Soil Biol Biochem* 32:769-777.
- 631 114. Ishizuka S, *et al.* (2009) Methane uptake rates in Japanese forest soils depend on  
632 the oxidation ability of topsoil, with a new estimate for global methane uptake in  
633 temperate forest. *Biogeochemistry* 92:281-295.
- 634 115. Ishizuka S, Tsuruta H, Murdiyarso D (2002) An intensive field study on CO<sub>2</sub>,  
635 CH<sub>4</sub>, and N<sub>2</sub>O emissions from soils at four land-use types in Sumatra, Indonesia.  
636 *Global Biogeochem Cy* 16:1049.
- 637 116. Itoh M, *et al.* (2010) Temporal and spatial variations of soil carbon dioxide,  
638 methane, and nitrous oxide fluxes in a Southeast Asian tropical rainforest.  
639 *Biogeosci Dis* 7:6847-6887.
- 640 117. Itoh M, *et al.* (2012) Effects of soil water status on the spatial variation of carbon  
641 dioxide, methane and nitrous oxide fluxes in tropical rain-forest soils in  
642 Peninsular Malaysia. *J Trop Ecol* 28:557-570.
- 643 118. Itoh M, Ohte N, Koba K (2009) Methane flux characteristics in forest soils under  
644 an East Asian monsoon climate. *Soil Biol Biochem* 41:388-395.
- 645 119. Jacinthe PA (2015) Carbon dioxide and methane fluxes in variably-flooded  
646 riparian forests. *Geoderma* 241-242:41-50.
- 647 120. Jacinthe PA, Lal R (2004) Effects of soil cover and land-use on the relations  
648 flux-concentration of trace gases. *Soil Sci* 169:243-259.
- 649 121. Jang I, Lee S, Hong J-H, Kang H (2006) Methane oxidation rates in forest soils  
650 and their controlling variables: a review and a case study in Korea. *Ecol Res*  
651 21:849-854.
- 652 122. Jang I, Lee S, Zoh K-D, Kang H (2011) Methane concentrations and  
653 methanotrophic community structure influence the response of soil methane  
654 oxidation to nitrogen content in a temperate forest. *Soil Biol Biochem* 43:620-627.
- 655 123. Jassal RS, Black TA, Roy R, Ethier G (2011) Effect of nitrogen fertilization on  
656 soil CH<sub>4</sub> and N<sub>2</sub>O fluxes, and soil and bole respiration. *Geoderma* 162:182-186.
- 657 124. J ikov áV, Picek T, Frouz J (2015) Seasonal changes in methane and carbon  
658 dioxide flux in wood ant (*Formica aquilonia*) nests and the surrounding forest  
659 soil. *Pedobiologia* 58:7-12.
- 660 125. Jones SP, *et al.* (2016) Drivers of atmospheric methane uptake by montane forest  
661 soils in the southern Peruvian Andes. *Biogeosciences* 13:4151-4165.
- 662 126. Kagotani Y, Hamabata E, Nakajima T (2001) Seasonal and spatial variations and  
663 the effects of clear-cutting in the methane absorption rates of a temperate forest  
664 soil. *Nutr Cycl Agroecosy* 59:169-175.
- 665 127. K ähk önen MA, Wittmann C, Ilvesniemi H, Westman CJ, Salkinoja-Salonen MS

- 666 (2002) Mineralization of detritus and oxidation of methane in acid boreal  
667 coniferous forest soils: seasonal and vertical distribution and effects of clear-cut.  
668 *Soil Biol Biochem* 34:1191-1200.
- 669 128. Karbin S, Hagedorn F, Dawes MA, Niklaus PA (2015) Treeline soil warming  
670 does not affect soil methane fluxes and the spatial micro-distribution of  
671 methanotrophic bacteria. *Soil Biol Biochem* 86:164-171.
- 672 129. Kato T, Yamada K, Tang Y, Yoshida N, Wada E (2013) Stable carbon isotopic  
673 evidence of methane consumption and production in three alpine ecosystems on  
674 the Qinghai-Tibetan Plateau. *Atmos Environ* 77:338-347.
- 675 130. Kaye JP, Burke IC, Mosier AR, Guerschman JP (2004) Methane and nitrous  
676 oxide fluxes from urban soil to the atmosphere. *Ecol Appl* 14:975-981.
- 677 131. Keller M, Kaplan WA, Wofsy SC (1986) Emissions of N<sub>2</sub>O, CH<sub>4</sub> and CO<sub>2</sub> from  
678 tropical forest soils. *J Geophys Res* 91:11791-11802.
- 679 132. Keller M, Mitre ME, Stallard RF (1990) Consumption of atmospheric methane  
680 in soils of central panama: effects of agricultural development. *Global*  
681 *Biogeochem Cy* 4:21-27.
- 682 133. Keller M, Reiners WA (1994) Soil-atmosphere exchange of nitrous oxide, nitric  
683 oxide, and methane under secondary succession of pasture to forest in the  
684 Atlantic lowlands of Coata Rica. *Global Biogeochem Cy* 8:399-409.
- 685 134. Keller M, *et al.* (2005) Soil-atmosphere exchange of nitrous oxide, nitric oxide,  
686 methane, and carbon dioxide in logged and undisturbed forest in the Tapajos  
687 National Forest, Brazil. *Earth Interact* 9:1-28.
- 688 135. Kiese R, Wochele S, Butterbach-Bahl K (2008) Site specific and regional  
689 estimates of methane uptake by tropical rainforest soils in north eastern Australia.  
690 *Plant Soil* 309:211-226.
- 691 136. Kim Y (2003) Effect of forest fire on the fluxes of CO<sub>2</sub>, CH<sub>4</sub> and N<sub>2</sub>O in boreal  
692 forest soils, interior Alaska. *J Geophys Res* 108:8154.
- 693 137. Kim YS, *et al.* (2012) Simulated nitrogen inputs influence methane and nitrous  
694 oxide fluxes from a young larch plantation in northern Japan. *Atmos Environ*  
695 46:36-44.
- 696 138. Kim YS, *et al.* (2011) Greenhouse gas emissions after a prescribed fire in white  
697 birch-dwarf bamboo stands in northern Japan, focusing on the role of charcoal.  
698 *Eur J Forest Res* 130:1031-1044.
- 699 139. King GM, Schnell S (1994) Effect of increasing atmospheric methane  
700 concentration on ammonium inhibition of soil methane consumption. *Nature*  
701 370:282-284.
- 702 140. Klemetsson ÅK, Klemetsson L (1997) Methane uptake in Swedish forest soil  
703 in relation to liming and extra N-deposition. *Biol Fert Soils* 25:296-301.
- 704 141. Klemetsson L, *et al.* (2010) Reduction of greenhouse gas emissions by wood  
705 ash application to a *Picea abies* (L.) Karst. forest on a drained organic soil. *Eur J*  
706 *Soil Sci* 61:734-744.
- 707 142. Koehler B, *et al.* (2012) An in-depth look into a tropical lowland forest soil:  
708 nitrogen-addition effects on the contents of N<sub>2</sub>O, CO<sub>2</sub> and CH<sub>4</sub> and N<sub>2</sub>O isotopic  
709 signatures down to 2-m depth. *Biogeochemistry* 111:695-713.



- 710 143. Koide T, *et al.* (2010) Effects of changes in the soil environment associated with  
711 heavy precipitation on soil greenhouse gas fluxes in a Siberian larch forest near  
712 Yakutsk. *Soil Sci Plant Nutr* 56:645-662.
- 713 144. Konda R, Ohta S, Ishizuka S, Heriyanto J, Wicaksono A (2010) Seasonal  
714 changes in the spatial structures of N<sub>2</sub>O, CO<sub>2</sub>, and CH<sub>4</sub> fluxes from Acacia  
715 mangium plantation soils in Indonesia. *Soil Biol Biochem* 42:1512-1522.
- 716 145. Kooch Y, Moghimian N, Bayranvand M, Alberti G (2016) Changes of soil  
717 carbon dioxide, methane, and nitrous oxide fluxes in relation to land use/cover  
718 management. *Environ Monit Assess* 188:346.
- 719 146. Korkiakoski M, *et al.* (2017) Methane exchange at the peatland forest floor -  
720 automatic chamber system exposes the dynamics of small fluxes. *Biogeosciences*  
721 14:1947-1967.
- 722 147. Koschorreck M, Conrad R (1993) Oxidation of atmospheric methane in soil:  
723 measurements in the field, in soil cores and in soil samples. *Global Biogeochem*  
724 *Cy* 7:109-121.
- 725 148. Köster E, *et al.* (2017a) Carbon dioxide, methane and nitrous oxide fluxes from a  
726 fire chronosequence in subarctic boreal forests of Canada. *Sci Total Environ* 601-  
727 602:895-905.
- 728 149. Köster E, Köster K, Berninger F, Pumpanen J (2015) Carbon dioxide, methane  
729 and nitrous oxide fluxes from podzols of a fire chronosequence in the boreal  
730 forests in Väriö, Finnish Lapland. *Geoderma Reg* 5:181-187.
- 731 150. Köster K, Köster E, Berninger F, Heinonsalo J, Pumpanen J (2017b) Contrasting  
732 effects of reindeer grazing on CO<sub>2</sub>, CH<sub>4</sub> and N<sub>2</sub>O fluxes originating from the  
733 northern boreal forest floor. *Land Degrad Dev* doi: 10.1002/ldr.2868
- 734 151. Krause K, Niklaus PA, Schleppe P (2013) Soil-atmosphere fluxes of the  
735 greenhouse gases CO<sub>2</sub>, CH<sub>4</sub> and N<sub>2</sub>O in a mountain spruce forest subjected to  
736 long-term N addition and to tree girdling. *Agr Forest Meteorol* 181:61-68.
- 737 152. Kravchenko I, Sukjacheva M (2017) Methane oxidation and diversity of aerobic  
738 methanotrophs in forest and agricultural soddy-podzolic soils. *Appl Soil Ecol*  
739 119:267-274.
- 740 153. Lang R, Blagodatsky S, Xu J, Cadisch G (2017) Seasonal differences in soil  
741 respiration and methane uptake in rubber plantation and rainforest. *Agr Ecosyst*  
742 *Environ* 240:314-328.
- 743 154. Lavoie M, Kellman L, Risk D (2013) The effects of clear-cutting on soil CO<sub>2</sub>,  
744 CH<sub>4</sub>, and N<sub>2</sub>O flux, storage and concentration in two Atlantic temperate forests in  
745 Nova Scotia, Canada. *Forest Ecol Manag* 304:355-369.
- 746 155. Leitner S, Sae-Tun O, Kranzinger L, Zechmeister-Boltenstern S, Zimmermann  
747 M (2016) Contribution of litter layer to soil greenhouse gas emissions in a  
748 temperate beech forest. *Plant Soil* 403:455-469.
- 749 156. Lessard R, *et al.* (1994) Methane and carbon dioxide fluxes from poorly drained  
750 adjacent cultivated and forest sites. *Can J Soil Sci* 74:139-146.
- 751 157. Li H (2010) Soil CH<sub>4</sub> fluxes response to understory removal and N-fixing  
752 species addition in four forest plantations in Southern China. *J Forestry Res*  
753 21:301-310.

- 754 158. Li X, *et al.* (2015) The contrasting effects of deposited  $\text{NH}_4^+$  and  $\text{NO}_3^-$  on soil  
755  $\text{CO}_2$ ,  $\text{CH}_4$  and  $\text{N}_2\text{O}$  fluxes in a subtropical plantation, southern China. *Ecol Eng*  
756 85:317-327.
- 757 159. Lin Z, *et al.* (2017) Effects of different biochars on *Pinus elliottii* growth, N use  
758 efficiency, soil  $\text{N}_2\text{O}$  and  $\text{CH}_4$  emissions and C storage in a subtropical area of  
759 China. *Pedosphere* 27:248-261.
- 760 160. Liu H, *et al.* (2008) Greenhouse gas fluxes from soils of different land-use types  
761 in a hilly area of South China. *Agr Ecosyst Environ* 124:125-135.
- 762 161. Liu XP, Zhang WJ, Hu CS, Tang XG (2014) Soil greenhouse gas fluxes from  
763 different tree species on Taihang Mountain, North China. *Biogeosciences*  
764 11:1649-1666.
- 765 162. Livesley SJ, Idczak D, Fest BJ (2013) Differences in carbon density and soil  
766  $\text{CH}_4/\text{N}_2\text{O}$  flux among remnant and agro-ecosystems established since European  
767 settlement in the Mornington Peninsula, Australia. *Sci Total Environ* 465:17-25.
- 768 163. Livesley SJ, *et al.* (2009) Soil-atmosphere exchange of greenhouse gases in a  
769 *Eucalyptus marginata* woodland, a clover-grass pasture, and *Pinus radiata* and  
770 *Eucalyptus globulus* plantations. *Global Change Biol* 15:425-440.
- 771 164. Lohila A, *et al.* (2016) Large contribution of boreal upland forest soils to a  
772 catchment-scale  $\text{CH}_4$  balance in a wet year. *Geophys Res Lett* 43:2946-2953.
- 773 165. Luo GJ, *et al.* (2012) Decadal variability of soil  $\text{CO}_2$ ,  $\text{NO}$ ,  $\text{N}_2\text{O}$ , and  $\text{CH}_4$  fluxes  
774 at the Högwald Forest, Germany. *Biogeosciences* 9:1741-1763.
- 775 166. Luo GJ, Kiese R, Wolf B, Butterbach-Bahl K (2013) Effects of soil temperature  
776 and moisture on methane uptake and nitrous oxide emissions across three  
777 different ecosystem types. *Biogeosciences* 10:3205-3219.
- 778 167. Macdonald JA, Eggleton P, Bignell DE, Forzi F, Fowler D (1998) Methane  
779 emission by termites and oxidation by soils, across a forest disturbance gradient  
780 in the Mbalmayo Forest Reserve, Cameroon. *Global Change Biol* 4:409-418.
- 781 168. Macdonald JA, *et al.* (1999) The effect of termite biomass and anthropogenic  
782 disturbance on the  $\text{CH}_4$  budgets of tropical forests in Cameroon and Borneo.  
783 *Global Change Biol* 5:869-879.
- 784 169. Macdonald JA, *et al.* (1997) The effect of nitrogen deposition and seasonal  
785 variability on methane oxidation and nitrous oxide emission rates in an upland  
786 spruce plantation and moorland. *Atmos Environ* 31:3693-3706.
- 787 170. Macdonald JA, *et al.* (1996) Soil environmental variables affecting the flux of  
788 methane from a range of forest, moorland and agricultural soils. *Biogeochemistry*  
789 34:113-132.
- 790 171. Machacova K, *et al.* (2016) *Pinus sylvestris* as a missing source of nitrous oxide  
791 and methane in boreal forest. *Sci Rep* 6: 23410.
- 792 172. Maier M, Paulus S, Nicolai C, Stutz KP, Nauer PA (2017a) Drivers of plot-scale  
793 variability of  $\text{CH}_4$  consumption in a well-aerated pine forest soil. *Forests* 8:193.
- 794 173. Maier M, Machacova K, Lang F, Svobodova K, Urban O (2017b) Combining  
795 soil and tree-stem flux measurements and soil gas profiles to understand  $\text{CH}_4$   
796 pathways in *Fagus sylvatica* forests. *J Plant Nutr Soil Sci*  
797 doi:10.1002/jpln.201600405.

- 798 174. Mäkiranta P, Laiho R, Penttilä T, Minkkinen K (2012) The impact of logging  
799 residue on soil GHG fluxes in a drained peatland forest. *Soil Biol Biochem* 48:1-9.
- 800 175. Maljanen M, Jokinen H, Saari A, Strommer R, Martikainen PJ (2006a) Methane  
801 and nitrous oxide fluxes, and carbon dioxide production in boreal forest soil  
802 fertilized with wood ash and nitrogen. *Soil Use Manag* 22:151-157.
- 803 176. Maljanen M, Liikanen A, Silvola J, Martikainen PJ (2003) Methane fluxes on  
804 agricultural and forested boreal organic soils. *Soil Use Manag* 19:73-79.
- 805 177. Maljanen M, Liimatainen M, Hytönen J, Martikainen PJ (2014) The effect of  
806 granulated wood-ash fertilization on soil properties and greenhouse gas (GHG)  
807 emissions in boreal peatland forests. *Boreal Environ Res* 19:295-309.
- 808 178. Maljanen M, Martikainen PJ, Aaltonen H, Silvola J (2002) Short-term variation  
809 in fluxes of carbon dioxide, nitrous oxide and methane in cultivated and forested  
810 organic boreal soils. *Soil Biol Biochem* 34:577-584.
- 811 179. Maljanen M, Nykänen H, Moilanen M, Martikainen PJ (2006b) Greenhouse gas  
812 fluxes of coniferous forest floors as affected by wood ash addition. *Forest Ecol*  
813 *Manag* 237:143-149.
- 814 180. Maljanen M, *et al.* (2017) The emissions of nitrous oxide and methane from  
815 natural soil temperature gradients in a volcanic area in southwest Iceland. *Soil*  
816 *Biol Biochem* 109:70-80.
- 817 181. Maris SC, Teira-Esmatges MR, Arbones A, Rufat J (2015) Effect of irrigation,  
818 nitrogen application, and a nitrification inhibitor on nitrous oxide, carbon dioxide  
819 and methane emissions from an olive (*Olea europaea* L.) orchard. *Sci Total*  
820 *Environ* 538:966-978.
- 821 182. Martins CSC, Macdonald CA, Anderson IC, Singh BK (2016) Feedback  
822 responses of soil greenhouse gas emissions to climate change are modulated by  
823 soil characteristics in dryland ecosystems. *Soil Biol Biochem* 100:21-32.
- 824 183. Martins CSC *et al.* (2017) Identifying environmental drivers of greenhouse gas  
825 emissions under warming and reduced rainfall in boreal-temperate forests. *Func*  
826 *Ecol* 31:2356-2368.
- 827 184. Martins CSC, Nazaries L, Macdonald CA, Anderson IC, Singh BK (2015) Water  
828 availability and abundance of microbial groups are key determinants of  
829 greenhouse gas fluxes in a dryland forest ecosystem. *Soil Biol Biochem* 86:5-16.
- 830 185. Mast MA, Wickland KP, Striegl RT, Clow DW (1998) Winter fluxes of CO<sub>2</sub> and  
831 CH<sub>4</sub> from subalpine soils in Rocky Mountain National Park, Colorado. *Global*  
832 *Biogeochem Cy* 12:607-620.
- 833 186. Matson A, Pennock D, Bedard-Haughn A (2009) Methane and nitrous oxide  
834 emissions from mature forest stands in the boreal forest, Saskatchewan, Canada.  
835 *Forest Ecol Manag* 258:1073-1083.
- 836 187. Matson AL, Corre MD, Langs K, Veldkamp E (2017) Soil trace gas fluxes along  
837 orthogonal precipitation and soil fertility gradients in tropical lowland forests of  
838 Panama. *Biogeosciences* 14:3509-3524.
- 839 188. Matson AL, Corre MD, Veldkamp E (2017b) Canopy soil greenhouse gas  
840 dynamics in response to indirect fertilization across an elevation gradient of  
841 tropical montane forests. *Biotropica* 49:153-159.

- 842 189. McHale PJ, Mitchell MJ, Bowles FP (1998) Soil warming in a northern  
843 hardwood forest: trace gas fluxes and leaf litter decomposition. *Can J Forest Res*  
844 28:1365-1372.
- 845 190. McLain JET, Kepler TB, Ahmann DM (2002) Belowground factors mediating  
846 changes in methane consumption in a forest soil under elevated CO<sub>2</sub>. *Global*  
847 *Biogeochem Cy* 16:1050.
- 848 191. McNamara NP, Black HIJ, Pearce TG, Reay DS, Ineson P (2008) The influence  
849 of afforestation and tree species on soil methane fluxes from shallow organic  
850 soils at the UK Gisburn Forest Experiment. *Soil Use Manag* 24:1-7.
- 851 192. McNamara NP, *et al.* (2015) Soil methane sink capacity response to a long-term  
852 wildfire chronosequence in northern Sweden. *PLoS One* 10:e0129892.
- 853 193. Menyailo OV, Hungate BA, Abraham W-R, Conrad R (2008) Changing land use  
854 reduces soil CH<sub>4</sub> uptake by altering biomass and activity but not composition of  
855 high-affinity methanotrophs. *Global Change Biol* 14:2405-2419.
- 856 194. Merino AN, Pérez-Batallón P, Macías F (2004) Responses of soil organic matter  
857 and greenhouse gas fluxes to soil management and land use changes in a humid  
858 temperate region of southern Europe. *Soil Biol Biochem* 36:917-925.
- 859 195. Meyer A, *et al.* (2013) A fertile peatland forest does not constitute a major  
860 greenhouse gas sink. *Biogeosciences* 10:7739-7758.
- 861 196. Mojeremane W, Rees RM, Mencuccini M (2010) Effects of site preparation for  
862 afforestation on methane fluxes at Harwood Forest, NE England.  
863 *Biogeochemistry* 97:89-107.
- 864 197. Mori T, *et al.* (2013a) Soil greenhouse gas fluxes and C stocks as affected by  
865 phosphorus addition in a newly established *Acacia mangium* plantation in  
866 Indonesia. *Forest Ecol Manag* 310:643-651.
- 867 198. Mori T, *et al.* (2013b) Effects of phosphorus application on CH<sub>4</sub> fluxes in an  
868 *Acacia mangium* plantation with and without root exclusion. *Tropics* 22:13-17.
- 869 199. Morishita T, Hatano R, Desyatkin RV (2003) CH<sub>4</sub> flux in an alaskan ecosystem  
870 formed by forest disturbance near Yakutsk, Eastern Siberia, Russia. *Soil Sci*  
871 *Plant Nutr* 49:369-377.
- 872 200. Morishita T, *et al.* (2004) Effect of nitrogen deposition on CH<sub>4</sub> uptake in forest  
873 soils in Hokkaido, Japan. *Soil Sci Plant Nutr* 50:1187-1194.
- 874 201. Morishita T, *et al.* (2014) CH<sub>4</sub> and N<sub>2</sub>O dynamics of a *Larix gmelinii* forest in a  
875 continuous permafrost region of central Siberia during the growing season. *Polar*  
876 *Sci* 8:156-165.
- 877 202. Morishita T, Noguchi K, Kim Y, Matsuura Y (2015) CO<sub>2</sub>, CH<sub>4</sub> and N<sub>2</sub>O fluxes  
878 of upland black spruce (*Picea mariana*) forest soils after forest fires of different  
879 intensity in interior Alaska. *Soil Sci Plant Nutr* 61:98-105.
- 880 203. Morishita T, *et al.* (2007) Methane uptake and nitrous oxide emission in  
881 Japanese forest soils and their relationship to soil and vegetation types. *Soil Sci*  
882 *Plant Nutr* 53:678-691.
- 883 204. Neto ES, *et al.* (2011) Soil-atmosphere exchange of nitrous oxide, methane and  
884 carbon dioxide in a gradient of elevation in the coastal Brazilian Atlantic forest.  
885 *Biogeosciences* 8:733-742.

- 886 205. Neufeld ADH, *et al.* (2015) Methane and nitrous oxide fluxes in relation to  
887 vegetation covers and bird activity in ice-free soils of Rip Point, Nelson Island,  
888 Antarctica. *Polar Res* 34:23584.
- 889 206. Okuda H, *et al.* (2007) Emission of N<sub>2</sub>O and CO<sub>2</sub> and uptake of CH<sub>4</sub> in soil from  
890 a satsuma mandarin orchard under mulching cultivation in central Japan. *J Japan*  
891 *Soc Hort Sci* 76:279-287.
- 892 207. Palm CA, *et al.* (2002) Nitrous oxide and methane fluxes in six different land use  
893 systems in the Peruvian Amazon. *Global Biogeochem Cy* 16:1073.
- 894 208. Pedersen EP, Elberling B, Michelsen A (2017) Seasonal variations in methane  
895 fluxes in response to summer warming and leaf litter addition in a subarctic heath  
896 ecosystem. *J Geophys Res: Biogeo* 122:2137-2153.
- 897 209. Peichl M, Arain MA, Ullah S, Moore TR (2010) Carbon dioxide, methane, and  
898 nitrous oxide exchanges in an age-sequence of temperate pine forests. *Global*  
899 *Change Biol* 16:2198-2212.
- 900 210. Pendall E, *et al.* (2010) Land use and season affect fluxes of CO<sub>2</sub>, CH<sub>4</sub>, CO, N<sub>2</sub>O,  
901 H<sub>2</sub> and isotopic source signatures in Panama: evidence from nocturnal boundary  
902 layer profiles. *Global Change Biol* 16:2721-2736.
- 903 211. Peterjohn WT, Melillo JM, Bowles FP, Steudler PA (1993) Soil warming and  
904 trace gas fluxes: experimental design and preliminary flux results. *Oecologia*  
905 93:18-24.
- 906 212. Peterjohn WT, *et al.* (1995) Responses of trace gas fluxes and N availability to  
907 experimentally elevated soil temperatures. *Ecol Appl* 4:617-625.
- 908 213. Petrakis S, Seyfferth A, Kan J, Inamdar S, Vargas R (2017) Influence of  
909 experimental extreme water pulses on greenhouse gas emissions from soils.  
910 *Biogeochemistry* 133:147-164.
- 911 214. Phillips RL, Whalen SC, Schlesinger WH (2001) Influence of atmospheric CO<sub>2</sub>  
912 enrichment on methane consumption in a temperate forest soil. *Global Change*  
913 *Biol* 7:557-563.
- 914 215. Priano ME, *et al.* (2014) Tree plantations on a grassland region: effects on  
915 methane uptake by soils. *Agroforest Syst* 88:187-191.
- 916 216. Price SJ, *et al.* (2004) Pristine New Zealand forest soil is a strong methane sink.  
917 *Global Change Biol* 10:16-26.
- 918 217. Priem éA, Christensen S (1997) Seasonal and spatial variation of methane  
919 oxidation in a Danish spruce forest. *Soil Biol Biochem* 29:1165-1172.
- 920 218. Priem éA, Christensen S (1999) Methane uptake by a selection of soils in Ghana  
921 with different land use. *J Geophys Res-Atmos* 104:23617-23622.
- 922 219. Priem éA, Christensen S, Dobbie KE, Smith KA (1997) Slow increase in rate of  
923 methane oxidation in soils with time following land use change from arable  
924 agriculture to woodland. *Soil Biol Biochem* 29:1269-1273.
- 925 220. Purbopuspito J, Veldkamp E, Brumme R, Murdiyarso D (2006) Trace gas fluxes  
926 and nitrogen cycling along an elevation sequence of tropical montane forests in  
927 Central Sulawesi, Indonesia. *Global Biogeochem Cy* 20:GB3010.
- 928 221. Raut N, Sitaula BK, Bakken LR, Dörsch P (2014) Fluxes of CH<sub>4</sub>, N<sub>2</sub>O, and

- 929 kinetics of denitrification in disturbed and undisturbed forest soil in India. *Can J*  
930 *Soil Sci* 94:237-249.
- 931 222. Reiners WA, Keller M, Gerow KG (1998) Estimating rainy season nitrous oxide  
932 and methane fluxes across forest and pasture landscapes in Costa Rica. *Water Air*  
933 *Soil Poll* 105:117-130.
- 934 223. Remy E, *et al.* (2017) Edge effects on N<sub>2</sub>O, NO and CH<sub>4</sub> fluxes in two temperate  
935 forests. *Sci Total Environ* 575:1150-1155.
- 936 224. Rosenkranz P, *et al.* (2006a) Soil N and C trace gas fluxes and microbial soil N  
937 turnover in a sessile oak (*Quercus petraea* (Matt.) Liebl.) forest in Hungary.  
938 *Plant Soil* 286:301-322.
- 939 225. Rosenkranz P, *et al.* (2006b) N<sub>2</sub>O, NO and CH<sub>4</sub> exchange, and microbial N  
940 turnover over a Mediterranean pine forest soil. *Biogeosciences* 3:121-133.
- 941 226. Rowlings DW, Grace PR, Kiese R, Weier KL (2012) Environmental factors  
942 controlling temporal and spatial variability in the soil-atmosphere exchange of  
943 CO<sub>2</sub>, CH<sub>4</sub> and N<sub>2</sub>O from an Australian subtropical rainforest. *Global Change*  
944 *Biol* 18:726-738.
- 945 227. Rowlings DW, Grace PR, Scheer C, Kiese R (2013) Influence of nitrogen  
946 fertiliser application and timing on greenhouse gas emissions from a lychee  
947 (*Litchi chinensis*) orchard in humid subtropical Australia. *Agr Ecosyst Environ*  
948 179:168-178.
- 949 228. Rustad LE, Fernandez IJ (1998) Experimental soil warming effects on CO<sub>2</sub> and  
950 CH<sub>4</sub> flux from a low elevation spruce-fir forest soil in Maine, USA. *Global*  
951 *Change Biol* 4:597-605.
- 952 229. Saari A, Heiskanen J, Martikainen PJ (1998) Effect of the organic horizon on  
953 methane oxidation and uptake in soil of a boreal Scots pine forest. *FEMS*  
954 *Microbial Ecol* 26:245-255.
- 955 230. Saari A, Smolander A, Martikainen PJ (2006) Methane consumption in a  
956 frequently nitrogen-fertilized and limed spruce forest soil after clear-cutting. *Soil*  
957 *Use Manag* 20:65-73.
- 958 231. Sabrekov AF, *et al.* (2015) Relationship of methane consumption with the  
959 respiration of soil and grass-moss layers in forest ecosystems of the southern  
960 taiga in Western Siberia. *Eurasian Soil Sci* 48: 841-851.
- 961 232. Sakabe A, *et al.* (2012) Measurement of methane flux over an evergreen  
962 coniferous forest canopy using a relaxed eddy accumulation system with tuneable  
963 diode laser spectroscopy detection. *Theor Appl Climatol* 109:39-49.
- 964 233. Sakabe A, Kosugi Y, Okumi C, Itoh M, Takahashi K (2016) Impacts of riparian  
965 wetlands on the seasonal variations of watershed-scale methane budget in a  
966 temperate monsoonal forest. *J Geophys Res* 121:1717-1732.
- 967 234. Sakabe A, *et al.* (2015) One year of continuous measurements of soil CH<sub>4</sub> and  
968 CO<sub>2</sub> fluxes in a Japanese cypress forest: temporal and spatial variations  
969 associated with Asian monsoon rainfall. *J Geophys Res-Biogeophys* 120:585-599.
- 970 235. Savage K, Moore TR, Crill PM (1997) Methane and carbon dioxide exchanges  
971 between the atmosphere and northern boreal forest soils. *J Geophys Res-Atmos*  
972 102:29279-29288.

- 973 236. Schiller CL, Hastie DR (1996) Nitrous oxide and methane fluxes from perturbed  
974 and unperturbed boreal forest sites in northern Ontario. *J Geophys Res*  
975 101:22767-22774.
- 976 237. Semenov VM, *et al.* (2004) Seasonal dynamics of atmospheric methane  
977 oxidation in gray forest soils. *Microbiology* 73:356-362.
- 978 238. Shrestha, R. K., Strahm, B. D., Sucre, E. B., Holub, S. M. & Meehan, N. (2014)  
979 Fertilizer management, parent material, and stand age influence forest soil  
980 greenhouse gas fluxes. *Soil Sci Soc Am J* 78:2041.
- 981 239. Shvaleva A, *et al.* (2014) Comparison of methane, nitrous oxide fluxes and CO<sub>2</sub>  
982 respiration rates from a Mediterranean cork oak ecosystem and improved pasture.  
983 *Plant Soil* 374:883-898.
- 984 240. Shvaleva A, *et al.* (2011) Soil-atmosphere greenhouse gases (CO<sub>2</sub>, CH<sub>4</sub> and N<sub>2</sub>O)  
985 exchange in evergreen oak woodland in southern Portugal. *Plant Soil Environ*  
986 57:471-477.
- 987 241. Shvaleva A, *et al.* (2015) Environmental and microbial factors influencing  
988 methane and nitrous oxide fluxes in Mediterranean cork oak woodlands: trees  
989 make a difference. *Front Microbial* 6:1104.
- 990 242. Singh BK, *et al.* (2009) Soil methane oxidation and methanotroph responses to  
991 afforestation of pastures with *Pinus radiata* stands. *Soil Biol Biochem* 41:2196-  
992 2205.
- 993 243. Singh JS, *et al.* (1997) Effect of soil nitrogen, carbon and moisture on methane  
994 uptake by dry tropical forest soils. *Plant Soil* 196:115-121.
- 995 244. Sitaula BK, Bakken LR, Abrahamsen G (1995) CH<sub>4</sub> uptake by temperate forest  
996 soil: effect of N input and soil acidification. *Soil Biol Biochem* 27:871-880.
- 997 245. Sjögersten S, Wookey PA (2002) Spatio-temporal variability and environmental  
998 controls of methane fluxes at the forest-tundra ecotone in the Fennoscandian  
999 mountains. *Global Change Biol* 8:885-894.
- 1000 246. Snover AK, Quay PD (2000) Hydrogen and carbon kinetic isotope effects during  
1001 soil uptake of atmospheric methane. *Global Biogeochem Cy* 14:25-39.
- 1002 247. Sommerfeld RA, Mosier AR, Musselman RC (1993) CO<sub>2</sub>, CH<sub>4</sub> and N<sub>2</sub>O flux  
1003 through a Wyoming snowpack and implications for global budgets. *Nature*  
1004 361:140-142.
- 1005 248. Song L, Tian P, Zhang J, Jin G (2017) Effects of three years of simulated  
1006 nitrogen deposition on soil nitrogen dynamics and greenhouse gas emissions in a  
1007 Korean pine plantation of northern China. *Sci Total Environ* 609:1303-1311.
- 1008 249. Steinkamp R, Butterbach-Bahl K, Papen H (2001) Methane oxidation by soils of  
1009 an N limited and N fertilized spruce forest in the Black Forest, Germany. *Soil*  
1010 *Biol Biochem* 33:145-153.
- 1011 250. Steudler PA, Bowden RD, Melillo JM, Aber JD (1989) Influence of nitrogen  
1012 fertilization on methane uptake in temperate forest soils. *Nature* 341:314-316.
- 1013 251. Steudler PA, Melillo JM, Bowden RD, Castro MS, Lugo AE (1991) The effects  
1014 of natural and human disturbances on soil nitrogen dynamics and trace gas fluxes  
1015 in a Puerto Rican wet forest. *Biotropica* 23:356-363.

- 1016 252. Steudler PA, *et al.* (1996) Consequence of forest-to-pasture conversion on CH<sub>4</sub>  
1017 fluxes in the Brazilian Amazon basin. *J Geophys Res- Atmos* 101:18547-18554.
- 1018 253. Strömngren M, Hedwall PO, Olsson BA (2016) Effects of stump harvest and site  
1019 preparation on N<sub>2</sub>O and CH<sub>4</sub> emissions from boreal forest soils after clear-cutting.  
1020 *Forest Ecol Manag* 371:15-22.
- 1021 254. Sullivan BW, *et al.* (2008) Thinning reduces soil carbon dioxide but not methane  
1022 flux from southwestern USA ponderosa pine forests. *Forest Ecol Manag*  
1023 255:4047-4055.
- 1024 255. Sullivan BW, *et al.* (2011) Wildfire reduces carbon dioxide efflux and increases  
1025 methane uptake in ponderosa pine forest soils of the southwestern USA.  
1026 *Biogeochemistry* 104:251-265.
- 1027 256. Sun J, *et al.* (2017) Ten years of elevated CO<sub>2</sub> affects soil greenhouse gas fluxes  
1028 in an open top chamber experiment. *Plant Soil* doi:10.1007/s11104-017-3414-7.
- 1029 257. Sundqvist E, *et al.* (2015) Methane exchange in a boreal forest estimated by  
1030 gradient method. *Tellus B* 67:26688.
- 1031 258. Sundqvist E, Vestin P, Crill P, Persson T, Lindroth A (2014) Short-term effects  
1032 of thinning, clear-cutting and stump harvesting on methane exchange in a boreal  
1033 forest. *Biogeosciences* 11:6095-6105.
- 1034 259. Takakai F, *et al.* (2008a) CH<sub>4</sub> and N<sub>2</sub>O emissions from a forest-alas ecosystem in  
1035 the permafrost taiga forest region, eastern Siberia, Russia. *J Geophys Res-*  
1036 *Biogeophys* 113:G02002.
- 1037 260. Takakai F, *et al.* (2008b) Influence of forest disturbance on CO<sub>2</sub>, CH<sub>4</sub> and N<sub>2</sub>O  
1038 fluxes from larch forest soil in the permafrost taiga region of eastern Siberia. *Soil*  
1039 *Sci Plant Nutr* 54:938-949.
- 1040 261. Tamai N, Takenaka C, Ishizuka S, Tezuka T (2003) Methane flux and regulatory  
1041 variables in soils of three equal-aged Japanese cypress (*Chamaecyparis obtusa*)  
1042 forests in central Japan. *Soil Biol Biochem* 35:633-641.
- 1043 262. Tang X, Liu S, Zhou G, Zhang D, Zhou C (2006) Soil-atmospheric exchange of  
1044 CO<sub>2</sub>, CH<sub>4</sub>, and N<sub>2</sub>O in three subtropical forest ecosystems in southern China.  
1045 *Global Change Biol* 12:546-560.
- 1046 263. Tate KR, *et al.* (2007) Methane uptake in soils from *Pinus radiata* plantations, a  
1047 reverting shrubland and adjacent pastures: effects of land-use change, and soil  
1048 texture, water and mineral nitrogen. *Soil Biol Biochem* 39:1437-1449.
- 1049 264. Tate KR, *et al.* (2006) Post-harvest patterns of carbon dioxide production,  
1050 methane uptake and nitrous oxide production in a *Pinus radiata* D. Don  
1051 plantation. *Forest Ecol Manag* 228:40-50.
- 1052 265. Teepe R, Brumme R, Beese F, Ludwig B (2004) Nitrous oxide emission and  
1053 methane consumption following compaction of forest soils. *Soil Sci Soc Am J*  
1054 68:605-611.
- 1055 266. Teh YA, *et al.* (2014) Methane and nitrous oxide fluxes across an elevation  
1056 gradient in the tropical Peruvian Andes. *Biogeosciences* 11:2325-2339.
- 1057 267. Torga R, *et al.* (2017) Weather extremes and tree species shape soil greenhouse  
1058 gas fluxes in an experimental fast-growing deciduous forest of air-humidity  
1059 manipulation. *Ecol Eng* 106:369-377.



- 1060 268. Āupek B, Minkkinen K, Pumpanen J, Vesala T, Nikinmaa E (2015) CH<sub>4</sub> and  
1061 N<sub>2</sub>O dynamics in the boreal forest-mire ecotone. *Biogeosciences* 12:281-297.
- 1062 269. Ueyama M, *et al.* (2015) Methane uptake in a temperate forest soil using  
1063 continuous closed-chamber measurements. *Agr Forest Meteorol* 213:1-9.
- 1064 270. Ullah S, Frasier R, Pelletier L, Moore TR (2009) Greenhouse gas fluxes from  
1065 boreal forest soils during the snow-free period in Quebec, Canada. *Can J Forest*  
1066 *Res* 39:666-680.
- 1067 271. Ullah S, Moore TR (2011) Biogeochemical controls on methane, nitrous oxide,  
1068 and carbon dioxide fluxes from deciduous forest soils in eastern Canada. *J*  
1069 *Geophys Res* 116:G03010.
- 1070 272. van Haren J, *et al.* (2013) Tree species effects on soil properties and greenhouse  
1071 gas fluxes in east-central Amazonia: comparison between monoculture and  
1072 diverse forest. *Biotropica* 45:709-718.
- 1073 273. van Huissteden J, Maximov TC, Kononov AV, Dolman AJ (2008) Summer soil  
1074 CH<sub>4</sub> emission and uptake in taiga forest near Yakutsk, eastern Siberia. *Agr Forest*  
1075 *Meteorol* 148:2006-2012.
- 1076 274. Vasconcelos SS, *et al.* (2004) Moisture and substrate availability constrain soil  
1077 trace gas fluxes in an eastern Amazonian regrowth forest. *Global Biogeochem Cy*  
1078 18:GB2009.
- 1079 275. Veldkamp E, Koehler B, Corre MD (2013) Indications of nitrogen-limited  
1080 methane uptake in tropical forest soils. *Biogeosciences* 10:5367-5379.
- 1081 276. Veldkamp E, Purbopuspito J, Corre MD, Brumme R, Murdiyarso D (2008) Land  
1082 use change effects on trace gas fluxes in the forest margins of central Sulawesi,  
1083 Indonesia. *J Geophys Res-Biogeophys* 113:G02003.
- 1084 277. Verchot LV, *et al.* (2008) Fluxes of CH<sub>4</sub>, CO<sub>2</sub>, NO, and N<sub>2</sub>O in an improved  
1085 fallow agroforestry system in eastern Amazonia. *Agr Ecosyst Environ* 126:113-  
1086 121.
- 1087 278. Verchot LV, Davidson EA, Catt  nio JH, Ackerman IL (2000) Land-use change  
1088 and biogeochemical controls of methane fluxes in soils of eastern Amazonia.  
1089 *Ecosystems* 3:41-56.
- 1090 279. von Arnold K, Nilsson M, H  nell B, Weslien P, Klemedtsson L (2005) Fluxes of  
1091 CO<sub>2</sub>, CH<sub>4</sub> and N<sub>2</sub>O from drained organic soils in deciduous forests. *Soil Biol*  
1092 *Biochem* 37:1059-1071.
- 1093 280. von Arnold KV, Weslien P, Nilsson M, Svensson BH, Klemedtsson L (2005b)  
1094 Fluxes of CO<sub>2</sub>, CH<sub>4</sub> and N<sub>2</sub>O from drained coniferous forests on organic soils.  
1095 *Forest Ecol Manag* 210:239-254.
- 1096 281. Wang H, Liu S, Mo J, Zhang T (2010) Soil-atmosphere exchange of greenhouse  
1097 gases in subtropical plantations of indigenous tree species. *Plant Soil* 335:213-  
1098 227.
- 1099 282. Wang H, *et al.* (2013a) Effects of tree species mixture on soil organic carbon  
1100 stocks and greenhouse gas fluxes in subtropical plantations in China. *Forest Ecol*  
1101 *Manag* 300:4-13.
- 1102 283. Wang JM, *et al.* (2013b) Methane fluxes measured by eddy covariance and static  
1103 chamber techniques at a temperate forest in central Ontario, Canada.

- 1104 *Biogeosciences* 10:4371-4382.
- 1105 284. Wang Y, *et al.* (2014) Simulated nitrogen deposition reduces CH<sub>4</sub> uptake and  
1106 increases N<sub>2</sub>O emission from a subtropical plantation forest soil in southern  
1107 China. *PLoS One* 9:e93571.
- 1108 285. Wang Y, *et al.* (2016) Relationships between ammonia-oxidizing communities,  
1109 soil methane uptake and nitrous oxide fluxes in a subtropical plantation soil with  
1110 nitrogen enrichment. *Eur J Soil Biol* 73:84-92.
- 1111 286. Wang Y, *et al.* (2013c) The litter layer acts as a moisture-induced bidirectional  
1112 buffer for atmospheric methane uptake by soil of a subtropical pine plantation.  
1113 *Soil Biol Biochem* 66:45-50.
- 1114 287. Warner DL, Villarreal S, McWilliams K, Inamdar S, Vargas R (2017) Carbon  
1115 dioxide and methane fluxes from tree stems, coarse woody debris, and soils in an  
1116 upland temperate forest. *Ecosystems* doi:10.1007/s10021-016-0106-8.
- 1117 288. Weitz AM, Keller M, Linder E, Crill PM (1999) Spatial and temporal variability  
1118 of nitrogen oxide and methane fluxes from a fertilized tree plantation in Costa  
1119 Rica. *J. Geophys Res-Atmos* 104:30097-30107.
- 1120 289. Weitz AM, Veldkamp E, Keller M, Neff J, Crill PM (1998) Nitrous oxide, nitric  
1121 oxide, and methane fluxes from soils following clearing and burning of tropical  
1122 secondary forest. *J Geophys Res-Atmos* 103:28047-28058.
- 1123 290. Werner C, Kiese R, Butterbach-Bahl K (2007) Soil-atmosphere exchange of N<sub>2</sub>O,  
1124 CH<sub>4</sub>, and CO<sub>2</sub> and controlling environmental factors for tropical rain forest sites  
1125 in western Kenya. *J Geophys Res* 112:D03308.
- 1126 291. Werner C, *et al.* (2006) N<sub>2</sub>O, CH<sub>4</sub> and CO<sub>2</sub> emissions from seasonal tropical  
1127 rainforests and a rubber plantation in southwest China. *Plant Soil* 289:335-353.
- 1128 292. Weslien P, Klemetsson AÅK, Börjesson G, Klemetsson L (2009) Strong pH  
1129 influence on N<sub>2</sub>O and CH<sub>4</sub> fluxes from forested organic soils. *Eur J Soil Sci*  
1130 60:311-320.
- 1131 293. Whalen S, Reeburgh W, Barber V (1992) Oxidation of methane in boreal forest  
1132 soils: a comparison of seven measures. *Biogeochemistry* 16:181-211.
- 1133 294. Whalen SC, Reeburgh WS (2000) Effect of nitrogen fertilization on atmospheric  
1134 methane oxidation in boreal forest soils. *Chemosphere* 2:151-155.
- 1135 295. Whalen SC, Reeburgh WS, Kizer KS (1991) Methane consumption and emission  
1136 by Taiga. *Global Biogeochem Cy* 5:261-273.
- 1137 296. Winsborough CL, Thomas SC, Basiliko N (2017) Soil responses to non-  
1138 nitrogenous amendments in a nitrogen-saturated temperate forest: an unexpected  
1139 decrease in methane oxidation after phosphorous and lime addition. *Can J Soil*  
1140 *Sci* 97:796-800.
- 1141 297. Wolf K, Flessa H, Veldkamp E (2012) Atmospheric methane uptake by tropical  
1142 montane forest soils and the contribution of organic layers. *Biogeochemistry*  
1143 111:469-483.
- 1144 298. Wu X, *et al.* (2011) Long-term effects of clear-cutting and selective cutting on  
1145 soil methane fluxes in a temperate spruce forest in southern Germany. *Environ*  
1146 *Pollut* 159:2467-2475.

- 1147 299. Xu H, Chen G, Huang G, Han S, Zhang X (1999) Factors controlling N<sub>2</sub>O and  
1148 CH<sub>4</sub> fluxes in mixed broad-leaved Korean pine forest of Changbai Mountain,  
1149 China. *J Forestry Res* 10:214-218.
- 1150 300. Xu M, *et al.* (2014) Low-level nitrogen addition promotes net methane uptake in  
1151 a boreal forest across the Great Xing'an Mountain region, China. *Forest Sci*  
1152 60:973-981.
- 1153 301. Xu X, Han L, Luo X, Han S (2011) Synergistic effects of nitrogen amendments  
1154 and ethylene on atmospheric methane uptake under a temperate old-growth forest.  
1155 *Adv Atmos Sci* 28:843-854.
- 1156 302. Xu X, Inubushi K (2008) Measurement of ethylene and methane production in a  
1157 temperate forest soil using inhibition of acetylene and carbon monoxide. *Chin Sci*  
1158 *Bull* 53:1087-1093.
- 1159 303. Yamulki S, Morison JIL (2017) Annual greenhouse gas fluxes from a temperate  
1160 deciduous oak forest floor. *Forestry*. 90:541-552.
- 1161 304. Yan J, *et al.* (2014) Responses of CO<sub>2</sub>, N<sub>2</sub>O and CH<sub>4</sub> fluxes between atmosphere  
1162 and forest soil to changes in multiple environmental conditions. *Global Chang*  
1163 *Biol* 20:300-312.
- 1164 305. Yan Y, *et al.* (2008) Fluxes of CH<sub>4</sub> and N<sub>2</sub>O from soil under a tropical seasonal  
1165 rain forest in Xishuangbanna, southwest China. *J Environ Sci* 20:207-215.
- 1166 306. Yang X, Wang C, Xu K (2017) Response of soil CH<sub>4</sub> fluxes to stimulated  
1167 nitrogen decomposition in a temperate deciduous forest in northern China: a 5-  
1168 year nitrogen addition experiment. *Eur J Soil Biol* 82:43-49.
- 1169 307. Yashiro Y, Kadir WR, Okuda T, Koizumi H (2008) The effects of logging on  
1170 soil greenhouse gas (CO<sub>2</sub>, CH<sub>4</sub>, N<sub>2</sub>O) flux in a tropical rain forest, Peninsular  
1171 Malaysia. *Agr Forest Meteorol* 148:799-806.
- 1172 308. Yavitt JB (2015) Land use history determines non-native earthworm impacts on  
1173 atmospheric methane consumption in forest soils, central New York State. *Can J*  
1174 *Soil Sci* 95:321-330.
- 1175 309. Yavitt JB, Downey DM, Lang GE, Sexstone AJ (1990a) Methane consumption  
1176 in two temperate forest soils. *Biogeochemistry* 9: 39-52.
- 1177 310. Yavitt JB, Fahey TJ, Simmons JA (1995) Methane and carbon dioxide dynamics  
1178 in a northern hardwood ecosystem. *Soil Sci Soc Am J* 59:796-804.
- 1179 311. Yavitt JB, Lang GE, Sexstone AJ (1990b) Methane fluxes in wetland and forest  
1180 soils, beaver ponds, and low-order streams of a temperate forest ecosystem. *J*  
1181 *Geophys Res* 95:22463-22474.
- 1182 312. Yavitt JB, Simmons JA, Fahey TJ (1993) Methane fluxes in a northern  
1183 hardwood forest ecosystem in relation to acid precipitation. *Chemosphere*  
1184 26:721-730.
- 1185 313. Yin S, *et al.* (2016) Seasonal variation in soil greenhouse gas emissions at three  
1186 age-stages of dawn redwood (*Metasequoia glyptostroboides*) stands in an alluvial  
1187 island, eastern China. *Forests* 7:256.
- 1188 314. Yonemura S, Kawashima S, Tsuruta H (2000) Carbon monoxide, hydrogen, and  
1189 methane uptake by soils in a temperate arable field and a forest. *J Geophys Res-*  
1190 *Atmos* 105:14347-14362.

- 1191 315. Yu L, Wang Y, Zhang X, Dörsch P, Mulder J (2017) Phosphorus addition  
1192 mitigates N<sub>2</sub>O and CH<sub>4</sub> emissions in N-saturated subtropical forest, SW China.  
1193 *Biogeoscience* 14:3097-3109.
- 1194 316. Zhang J, *et al.* (2014a) Understory vegetation management affected greenhouse  
1195 gas emissions and labile organic carbon pools in an intensively managed Chinese  
1196 chestnut plantation. *Plant Soil* 376:363-375.
- 1197 317. Zhang J, *et al.* (2015) Understory management and fertilization affected soil  
1198 greenhouse gas emissions and labile organic carbon pools in a Chinese chestnut  
1199 plantation. *Forest Ecol Manag* 337:126-134.
- 1200 318. Zhang K, *et al.* (2017) Impact of nitrogen fertilization on soil-atmosphere  
1201 greenhouse gas exchanges in eucalypt plantations with different soil  
1202 characteristics in southern China. *PLoS One* 12:e0172142.
- 1203 319. Zhang T, Zhu W, Mo J, Liu L, Dong S (2011) Increased phosphorus availability  
1204 mitigates the inhibition of nitrogen deposition on CH<sub>4</sub> uptake in an old-growth  
1205 tropical forest, southern China. *Biogeosciences* 8:2805-2813.
- 1206 320. Zhang W, *et al.* (2008) Methane uptake responses to nitrogen deposition in three  
1207 tropical forests in southern China. *J Geophys Res* 113:D11116.
- 1208 321. Zhang W, *et al.* (2014b) Methane uptake in forest soils along an urban-to-rural  
1209 gradient in Pearl River Delta, south China. *Sci Rep* 4:5120.
- 1210 322. Zhang W, *et al.* (2012) Large difference of inhibitive effect of nitrogen  
1211 deposition on soil methane oxidation between plantations with N-fixing tree  
1212 species and non-N-fixing tree species. *J Geophys Res-Bioge* 117:G00N16.
- 1213 323. Zhao Y, Wang YZ, Xu ZH, Fu L (2015) Impacts of prescribed burning on soil  
1214 greenhouse gas fluxes in a suburban native forest of south-eastern Queensland,  
1215 Australia. *Biogeosciences* 12:6279-6290.
- 1216 324. Zheng M, *et al.* (2016) Effects of nitrogen and phosphorus additions on soil  
1217 methane uptake in disturbed forests. *J Geophys Res-Bioge* 121:3089-3100.
